# Supplementary material
Source: publisher figshare collection journal article supplement (https://gsapubs.figshare.com/articles/dataset/_/12540449)
Supplement: Supplementary file 1 [file 1]

## Sheet: CB-21
Table S1. Detrital zircon single grain fission-track and U-Pb data
Sample ID	CB-21
Formation	West Foreland Fm.
Analyst	Sonia Sanchez
Zeta [a cm-2]	122.673
Zeta Error	8.25757
	Analysis Name	Ns	Ni	n	ρd	U (ppm)	FT age (Ma)	FT 1σ error (Ma)	U-Pb age (Ma)	U-Pb 1σ error (Ma)	Grain Type
1	CB21-2_4	96	8	32	427963	78.4953	307.544	115.172
2	CB21-2_5	36	17	40	427963	133.442	55.3495	16.736
3	CB21-2_7	203	74	25	427963	929.385	71.6104	10.9227	367.16	7.8514	Exhumational
4	CB21-2_8	132	35	32	427963	343.417	98.2468	19.8868	2016.2	12.7893	Exhumational
5	CB21-2_10	216	63	30	427963	659.361	89.3769	14.2242	180.619	3.98388	Exhumational
6	CB21-2_14	217	68	28	427963	762.526	83.2282	12.9311	68.2695	1.50227	Magmatic
7	CB21-2_16	69	37	30	427963	387.244	48.7674	10.4986
8	CB21-2_18	58	20	20	427963	313.981	75.6785	20.3161
9	CB21-2_19	28	12	30	427963	125.593	60.9604	21.4554	176.417	6.07724	Exhumational
10	CB21-2_20	88	36	25	427963	452.133	63.8489	13.388
11	CB21-2_21	49	25	28	427963	280.34	51.2454	13.0885	67.8495	1.78763	Exhumational
12	CB21-2_24	182	62	36	427963	540.746	76.599	12.4574	96.7215	1.71185	Exhumational
13	CB21-2_25	159	29	36	427963	252.929	142.338	30.3944	1877.55	13.0768	Exhumational
14	CB21-2_26	92	17	21	427963	254.175	140.515	38.358	1839.56	10.7308	Exhumational
15	CB21-2_28	55	28	30	427963	293.049	51.357	12.4451	74.3561	1.86488	Exhumational
16	CB21-2_29	126	35	42	427963	261.651	93.8134	19.0729	1757.56	14.2972	Exhumational
17	CB21-2_30	145	20	24	427963	261.651	187.556	46.5963	367.112	9.47123	Exhumational
18	CB21-2_32	82	15	42	427963	112.136	141.925	41.0572	2687.86	10.9709	Exhumational
19	CB21-2_33	135	37	35	427963	331.923	95.0718	18.8376	62.0193	1.18506	Magmatic
20	CB21-2_34	73	21	16	427963	412.1	90.6095	23.3033	2837.33	11.1799	Exhumational
21	CB21-2_36	160	19	36	427963	165.712	217.346	54.8587	2044.98	14.7695	Exhumational
22	CB21-2_38	208	103	42	427963	770.002	52.7925	7.34214	68.3728	1.5519	Exhumational
23	CB21-2_39	93	33	20	427963	518.069	73.5555	15.7555	353.452	6.574	Exhumational
24	CB21-2_42	167	45	50	427963	282.583	96.6872	17.5736	207.723	3.37978	Exhumational
25	CB21-2_43	78	25	36	427963	218.043	81.3835	19.5398	104.377	2.48623	Exhumational
26	CB21-2_45	300	146	36	427963	1273.37	53.7135	6.58033	65.0953	1.18616	Exhumational
27	CB21-2_46	88	31	24	427963	405.559	74.0882	16.3074	53.5984	0.674954	Magmatic
28	CB21-2_47	161	30	36	427963	261.651	139.357	29.3544	373.817	11.393	Exhumational
29	CB21-2_48	135	34	36	427963	296.538	103.394	21.0996	1760.49	13.0079	Exhumational
30	CB21-2_49	72	45	42	427963	336.409	41.8634	8.47015	99.9607	1.85312	Exhumational
31	CB21-2_50	125	32	36	427963	279.094	101.731	21.3577	1847.45	11.2231	Exhumational
32	CB21-2_51	179	55	24	427963	719.54	84.8701	14.3513	368.355	5.17323	Exhumational
33	CB21-2_52	84	54	36	427963	470.972	40.7042	7.64208	1169.41	12.2893	Exhumational
34	CB21-2_53	151	25	25	427963	313.981	156.631	35.5272	375.68	8.5459	Exhumational
35	CB21-2_55	84	20	25	427963	251.185	109.317	28.239	1500.62	16.6458	Exhumational
36	CB21-2_56	144	53	50	427963	332.82	70.9286	12.4151	348.182	5.71885	Exhumational
37	CB21-2_57	135	48	24	427963	627.963	73.408	13.3486	348.279	7.72744	Exhumational
38	CB21-2_58	107	31	35	427963	278.098	89.9734	19.387	1776.38	9.79446	Exhumational
39	CB21-2_59	69	21	42	427963	156.991	85.6775	22.1667	2717.41	10.9682	Exhumational
40	CB21-2_60	200	49	42	427963	366.311	106.261	18.4766	354.743	6.75088	Exhumational
41	CB21-2_62	170	71	36	427963	619.241	62.5472	9.84843	60.3832	1.00887	Magmatic
42	CB21-2_66	92	31	42	427963	231.748	77.4357	16.957	57.0163	0.967265	Magmatic
43	CB21-2_69	176	82	42	427963	613.011	56.0962	8.45221	248.451	4.90432	Exhumational
44	CB21-2_70	144	50	40	427963	392.477	75.1596	13.3965	71.043	1.20245	Magmatic
45	CB21-2_71	116	63	40	427963	494.521	48.1527	8.24511	373.103	6.40965	Exhumational
46	CB21-2_72	110	34	28	427963	381.263	84.3713	17.5622	186.162	2.85472	Exhumational
47	CB21-2_73	180	33	40	427963	259.035	141.614	28.564	1776.34	9.66308	Exhumational
48	CB21-2_75	172	50	35	427963	448.545	89.6727	15.6964	365.799	5.64792	Exhumational
49	CB21-2_76	207	37	24	427963	484.054	145.209	27.8118	346.248	6.35686	Exhumational
50	CB21-2_77	64	21	16	427963	412.1	79.5071	20.7435	1880.6	13.248	Exhumational
51	CB21-2_78	84	24	35	427963	215.301	91.2258	22.0451	82.331	1.96392	Magmatic
52	CB21-2_79	129	54	40	427963	423.875	62.4048	11.0045	92.3907	1.83284	Exhumational
53	CB21-2_80	180	89	32	427963	873.26	52.8721	7.77364	360.013	4.70351	Exhumational
54	CB21-2_81	246	73	40	427963	573.016	87.8568	13.2046
55	CB21-2_82	160	55	20	427963	863.449	75.9143	12.985	97.8488	2.32521	Exhumational
56	CB21-2_83	134	50	40	427963	392.477	69.9684	12.5726	102.065	2.27038	Exhumational
57	CB21-2_84	222	54	50	427963	339.1	107.023	17.8598	1920.53	10.7972	Exhumational
58	CB21-2_85	229	44	50	427963	276.304	135.191	24.1533	370.595	8.22061	Exhumational
59	CB21-2_86	143	39	42	427963	291.554	95.5378	18.4908	65.615	1.27427	Magmatic
60	CB21-2_87	75	21	24	427963	274.734	93.0742	23.8709	1998.43	11.8673	Exhumational
61	CB21-2_88	169	59	36	427963	514.58	74.755	12.4399	1983.43	12.9065	Exhumational
62	CB21-2_89	110	50	40	427963	392.477	57.4924	10.588	105.324	1.44719	Exhumational
63	CB21-2_90	211	85	42	427963	635.438	64.8341	9.4688	97.0387	2.04453	Exhumational
64	CB21-2_91	281	110	36	427963	959.387	66.7099	8.81863	70.5524	1.34792	Magmatic
65	CB21-2_92	115	33	36	427963	287.816	90.8336	19.0153	2672.53	10.3004	Exhumational
66	CB21-2_93	259	96	36	427963	837.283	70.4336	9.73493	64.4367	1.09476	Magmatic
67	CB21-2_94	168	44	30	427963	460.506	99.4554	18.2047	98.3783	2.04977	Magmatic
68	CB21-2_95	109	19	42	427963	142.039	148.859	38.4251	1813.68	16.5874	Exhumational
69	CB21-2_96	222	83	32	427963	814.389	69.8307	10.2102	97.024	2.39615	Exhumational
70	CB21-3_1	124	18	36	428891	156.651	178.724	46.7579	2282.83	11.7683	Exhumational
71	CB21-3_2	38	2	25	428891	25.0641	481.4	350.841
72	CB21-3_3	305	116	30	428891	1211.43	68.8001	8.89756	98.256	2.31482	Exhumational
73	CB21-3_5	125	89	20	428891	1394.19	36.8422	5.71487	74.4389	6.07903	Exhumational
74	CB21-3_6	96	54	28	428891	604.225	46.5987	8.56208	56.5684	1.37157	Exhumational
75	CB21-3_9	135	19	24	428891	248.031	184.258	46.9277	2052.16	19.7046	Exhumational
76	CB21-3_10	124	17	32	428891	166.442	189.084	50.6356	1860.02	13.0871	Exhumational
77	CB21-3_11	99	35	23	428891	476.764	73.9843	15.4303	57.8465	1.40455	Magmatic
78	CB21-3_12	154	57	16	428891	1116.14	70.6854	12.0088	102.024	2.70641	Exhumational
79	CB21-3_13	65	34	16	428891	665.766	50.0971	11.1596	2298.04	13.3802	Exhumational
80	CB21-3_14	106	19	25	428891	238.109	145.118	37.5324	1936.47	14.859	Exhumational
81	CB21-3_15	114	26	25	428891	325.834	114.325	26.0849	1863.67	14.8935	Exhumational
82	CB21-3_16	121	52	36	428891	452.547	60.9249	10.9531	58.4386	1.30213	Magmatic
83	CB21-3_17	93	62	36	428891	539.575	39.3398	7.00505	61.3968	0.976132	Exhumational
84	CB21-3_18	63	57	36	428891	496.061	29.0105	5.67319	56.2097	1.13208	Exhumational
85	CB21-3_19	140	42	40	428891	328.967	87.0981	16.4746	101.352	2.03698	Magmatic
86	CB21-3_20	76	31	16	428891	607.022	64.1734	14.3842	57.6566	1.28561	Magmatic
87	CB21-3_21	67	14	24	428891	182.759	124.683	37.6492	2580.46	12.086	Exhumational
88	CB21-3_22	170	37	40	428891	289.804	119.75	23.2619	357.326	6.2548	Exhumational
89	CB21-3_23	57	15	30	428891	156.651	99.1984	29.5997	2024.29	13.1535	Exhumational
90	CB21-3_24	156	36	25	428891	451.155	113	22.3195	1799.08	17.3435	Exhumational
91	CB21-3_25	177	61	36	428891	530.873	75.8842	12.4387	358.176	8.15734	Exhumational
92	CB21-3_26	156	44	35	428891	393.865	92.601	17.0655	355.23	6.03218	Exhumational
93	CB21-3_27	132	53	30	428891	553.5	65.1879	11.5272	353.558	6.41089	Exhumational
94	CB21-3_28	201	78	40	428891	610.939	67.4364	10.1427	67.6044	1.36006	Magmatic
95	CB21-3_29	151	25	30	428891	261.085	156.966	35.6033	355.396	6.35374	Exhumational
96	CB21-3_30	129	69	42	428891	514.71	48.9955	8.06124	44.6351	0.747718	Magmatic
97	CB21-3_31	137	93	42	428891	693.74	38.6369	5.84395
98	CB21-3_32	251	36	35	428891	322.253	180.856	34.5938	225.858	3.98281	Exhumational
99	CB21-3_33	115	41	42	428891	305.842	73.3681	14.2854	354.24	5.87608	Exhumational
100	CB21-3_34	58	21	28	428891	234.976	72.2503	19.0727	354.245	5.4168	Exhumational
101	CB21-3_35	250	73	30	428891	762.368	89.4678	13.4274	93.8885	1.68204	Magmatic
102	CB21-3_36	151	30	36	428891	261.085	131.069	27.7363	98.3008	2.70028	Magmatic
103	CB21-3_41	65	21	42	428891	156.651	80.9156	21.0737	69.484	1.70484	Magmatic
104	CB21-3_42	182	27	24	428891	352.465	174.932	38.0681
105	CB21-3_43	122	44	30	428891	459.509	72.5318	13.714	56.2538	0.897375	Magmatic

## Sheet: CB-18
Table S1. Detrital zircon single grain fission-track and U-Pb data
Sample ID	CB-18
Formation	Tyonek Fm.
Analyst	Sonia Sanchez
Zeta [a cm-2]	122.673
Zeta Error	8.25757
	Analysis Name	Ns	Ni	n	ρd	U (ppm)	FT age (Ma)	FT 1σ error (Ma)	U-Pb age (Ma)	U-Pb 1σ error (Ma)	Grain Type
1	CB18-3_3	73	14	30	421467	148.783	133.406	40.0114	150.846	2.7918	Magmatic
2	CB18-3_4	34	5	16	421467	99.6316	173.435	83.9392	1999.36	14.7625	Exhumational
3	CB18-3_5	60	25	36	421467	221.404	61.7465	15.3117	105.701	2.07886	Exhumational
4	CB18-3_7	37	6	28	421467	68.3188	157.477	70.1648	55.6363	1.50853	Exhumational
5	CB18-3_8	152	32	42	421467	242.911	121.639	25.122	1784.35	13.6616	Exhumational
6	CB18-3_9	173	52	36	421467	460.519	85.4367	14.7577	357.679	7.14797	Exhumational
7	CB18-3_10	115	30	25	421467	382.585	98.3428	21.2872	370.178	5.65658	Exhumational
8	CB18-3_11	28	7	45	421467	49.5944	102.585	43.9318	2810.73	13.2678	Exhumational
9	CB18-3_12	85	13	42	421467	98.6827	166.85	51.0227	2781.61	9.78032	Exhumational
10	CB18-3_13	60	30	35	421467	273.275	51.4964	12.0578	105.354	1.70395	Exhumational
11	CB18-3_14	165	41	30	421467	435.722	103.205	19.384	108.015	2.26664	Magmatic
12	CB18-3_15	141	44	36	421467	389.67	82.314	15.3212	95.1034	1.54741	Magmatic
13	CB18-3_16	166	55	49	421467	357.86	77.5556	13.2144	69.3485	1.43693	Magmatic
14	CB18-3_17	89	29	40	421467	231.145	78.8526	17.7277	108.502	2.90984	Exhumational
15	CB18-3_18	124	30	30	421467	318.821	105.976	22.7845	1788.97	10.2563	Exhumational
16	CB18-3_19	63	19	49	421467	123.625	85.1527	23.0589	2687.98	11.5241	Exhumational
17	CB18-3_20	89	35	50	421467	223.175	65.4033	13.8174	81.5826	1.25904	Exhumational
18	CB18-3_22	179	70	50	421467	446.35	65.7689	10.3359	105.024	1.89712	Exhumational
19	CB18-3_23	121	58	40	421467	462.291	53.7068	9.35353	375.328	7.9415	Exhumational
20	CB18-3_24	169	82	35	421467	746.952	53.06	8.03605	71.3372	0.992341	Exhumational
21	CB18-3_25	131	55	28	421467	626.256	61.2809	10.727	63.8303	1.20304	Magmatic
22	CB18-3_26	203	57	36	421467	504.8	91.4158	15.1031	106.107	1.58617	Magmatic
23	CB18-3_27	112	40	36	421467	354.246	71.9803	14.1701	61.5715	1.60755	Magmatic
24	CB18-3_28	39	9	49	421467	58.559	111.06	41.7884	65.7088	1.45408	Exhumational
25	CB18-3_29	104	38	42	421467	288.457	70.3655	14.2056	105.028	2.09914	Exhumational
26	CB18-3_30	41	7	16	421467	139.484	149.664	62.0832	1061.65	20.7894	Exhumational
27	CB18-3_31	85	34	36	421467	301.109	64.3065	13.7925	65.1974	1.27739	Magmatic
28	CB18-3_32	182	63	36	421467	557.937	74.2523	12.0172	101.204	1.64439	Exhumational
29	CB18-3_33	97	33	36	421467	292.253	75.5429	16.1028	63.1999	1.49532	Magmatic
30	CB18-3_34	73	17	40	421467	135.499	110.064	30.6103	106.428	2.15711	Magmatic
31	CB18-3_35	158	40	40	421467	318.821	101.312	19.2639	205.537	3.62044	Exhumational
32	CB18-3_37	71	32	35	421467	291.494	57.1039	12.7892	1849.23	15.4001	Exhumational
33	CB18-3_38	64	35	28	421467	398.526	47.0985	10.428	45.2331	0.931081	Magmatic
34	CB18-3_39	101	31	36	421467	274.54	83.6798	18.1384	358.696	6.8023	Exhumational
35	CB18-3_40	102	26	42	421467	197.365	100.627	23.186	1825.86	9.48246	Exhumational
36	CB18-3_41	100	51	40	421467	406.497	50.4906	9.36915	95.7856	1.69081	Exhumational
37	CB18-3_42	82	28	35	421467	255.057	75.2663	17.2842	58.8046	0.889188	Magmatic
38	CB18-3_43	83	27	40	421467	215.204	78.983	18.3388
39	CB18-3_46	164	42	20	421467	669.524	100.161	18.6667	100.092	1.74566	Magmatic
40	CB18-3_47	40	16	40	421467	127.528	64.3065	19.5396	72.217	1.74125	Magmatic
41	CB18-3_50	201	72	36	421467	637.642	71.7673	11.046	70.6612	1.62964	Magmatic
42	CB18-3_51	94	30	42	421467	227.729	80.4961	17.7817	370.359	5.75781	Exhumational
43	CB18-3_53	131	53	30	421467	563.251	63.5821	11.2537	107.548	2.04177	Exhumational
44	CB18-3_54	147	70	24	421467	929.895	54.0604	8.70255	63.4217	1.16164	Exhumational
45	CB18-3_55	186	89	36	421467	788.197	53.8012	7.87739	70.1141	1.38901	Exhumational
46	CB18-3_56	96	38	40	421467	302.88	64.98	13.2467	65.5753	1.20036	Magmatic
47	CB18-3_58	137	19	40	421467	151.44	183.758	46.7613	1131.91	16.1644	Exhumational
48	CB18-3_59	118	33	40	421467	263.027	91.7816	19.1652	358.823	4.6916	Exhumational
49	CB18-3_61	108	19	42	421467	144.229	145.295	37.5289	1799.11	11.4054	Exhumational
50	CB18-3_62	72	19	42	421467	144.229	97.226	25.9697	1143.45	13.5836	Exhumational
51	CB18-3_63	96	27	30	421467	286.939	91.2667	20.8678	109.439	2.46526	Magmatic
52	CB18-3_64	104	23	36	421467	203.691	115.846	27.8799	1843.52	12.201	Exhumational
53	CB18-3_65	78	31	36	421467	274.54	64.7193	14.4578	102.294	1.69944	Exhumational
54	CB18-3_66	54	16	49	421467	104.105	86.6631	25.3915	81.8528	1.48535	Magmatic
55	CB18-3_67	34	14	50	421467	89.2699	62.478	20.3093	101.16	3.56386	Exhumational
56	CB18-3_68	105	30	36	421467	265.684	89.8506	19.6201	104.771	1.96652	Magmatic
57	CB18-3_69	74	26	40	421467	207.234	73.1601	17.4362	80.9404	1.46346	Magmatic
58	CB18-3_70	154	38	42	421467	288.457	103.924	20.1609	194.977	4.54522	Exhumational
59	CB18-3_71	159	39	42	421467	296.048	104.542	20.0425	102.81	1.51649	Magmatic
60	CB18-3_72	102	51	42	421467	387.14	51.4964	9.52854	61.2801	0.998671	Exhumational
61	CB18-3_73	71	38	42	421467	288.457	48.1211	10.2336	103.113	2.00154	Exhumational
62	CB18-3_74	113	51	50	421467	325.198	57.0254	10.4035	104.746	1.74739	Exhumational
63	CB18-3_76	129	64	30	421467	680.152	51.8971	8.71538	65.1753	1.4175	Exhumational
64	CB18-3_77	124	68	50	421467	433.597	46.9691	7.80252	62.2882	1.47884	Exhumational
65	CB18-3_79	196	42	40	421467	334.762	119.525	21.9539	106.705	1.86504	Magmatic
66	CB18-3_80	92	25	42	421467	189.774	94.4378	22.2871	108.398	2.39566	Magmatic
67	CB18-3_81	40	20	50	421467	127.528	51.4964	14.5495	58.1135	1.64321	Magmatic
68	CB18-3_82	133	23	40	421467	183.322	147.781	34.916	164.018	4.69869	Magmatic
69	CB18-3_83	51	35	42	421467	265.684	37.5594	8.64722	108.815	1.80076	Exhumational
70	CB18-3_84	113	26	42	421467	197.365	111.386	25.4333	2836.91	10.9406	Exhumational
71	CB18-3_85	31	13	30	421467	138.156	61.3526	20.7156	104.83	2.35307	Exhumational
72	CB18-3_88	94	40	35	421467	364.367	60.4661	12.1631	73.9624	1.2388	Exhumational
73	CB18-3_90	152	66	42	421467	501.005	59.2631	9.65752	62.686	1.35982	Magmatic
74	CB18-3_89	49	28	35	421467	255.057	45.0818	11.1296	81.4178	1.17895	Exhumational
75	CB18-3_91	111	36	35	421467	327.93	79.2195	16.1601	2763.43	10.7516	Exhumational
76	CB18-3_92	63	12	25	421467	153.034	134.311	43.3205	2714.14	11.9549	Exhumational
77	CB18-3_94	151	69	30	421467	733.289	56.3264	9.07201	98.6858	1.8149	Exhumational
78	CB18-3_95	130	79	42	421467	599.687	42.4004	6.72765	67.8349	1.95137	Exhumational
79	CB18-3_96	98	26	50	421467	165.787	96.7105	22.3674	104.082	1.67017	Magmatic
80	CB18-3_97	55	15	40	421467	119.558	94.0981	28.1783	103.569	5.0375	Magmatic
81	CB18-3_98	106	69	30	421467	733.289	39.5918	6.71337	67.3245	0.971756	Exhumational
82	CB18-3_100	152	49	40	421467	390.556	79.6972	14.2149	98.0094	2.4706	Exhumational
83	CB18-3_101	32	18	30	421467	191.293	45.7948	13.8624	78.6217	1.60728	Exhumational
84	CB18-3_102	149	59	36	421467	522.512	64.9572	10.9634	255.807	12.8154	Exhumational
85	CB18-3_103	110	35	28	421467	398.526	80.7393	16.6425	1900.72	18.9458	Exhumational
86	CB18-3_104	123	13	35	421467	118.419	240.068	71.9717	225.657	3.91958	Magmatic
87	CB18-3_105	81	31	40	421467	247.086	67.1956	14.9394	65.4557	1.2915	Magmatic
88	CB18-3_106	119	39	20	421467	621.701	78.401	15.4571	397.187	7.29814	Exhumational
89	CB18-3_107	45	17	50	421467	108.399	68.0693	19.9469	75.3936	1.63578	Magmatic
90	CB18-3_108	95	25	40	421467	199.263	97.4941	22.9374	107.211	2.72793	Magmatic
91	CB18-3_109	126	37	50	421467	235.928	87.4386	17.4415	102.978	1.94312	Magmatic
92	CB18-3_110	115	40	42	421467	303.639	73.8974	14.5037	61.168	1.29744	Magmatic
93	CB18-3_111	50	20	36	421467	177.123	64.3065	17.5906	64.9926	1.44017	Magmatic
94	CB18-3_112	59	13	35	421467	118.419	116.27	36.5277	94.1501	2.29701	Magmatic
95	CB18-3_113	257	88	36	421467	779.34	75.0589	10.6362	70.2093	3.94925	Magmatic
96	CB18-3_114	80	36	40	421467	286.939	57.1929	12.1464	67.3085	1.08195	Magmatic
97	CB18-3_115	87	32	42	421467	242.911	69.9029	15.2462	64.6863	1.33488	Magmatic
98	CB18-3_116	68	22	36	421467	194.835	79.4129	20.2442	104.284	1.64937	Exhumational
99	CB18-3_117	62	102	36	421467	903.326	15.6944	2.7525	70.7705	1.31546	Exhumational
100	CB18-3_118	71	13	40	421467	103.617	139.664	43.2357
101	CB18-3_119	123	12	49	421467	78.0786	259.676	80.5785	215.621	3.7285	Magmatic
102	CB18-3_120	25	10	50	421467	63.7642	64.3065	24.4724	55.9691	1.37041	Magmatic
103	CB18-3_121	158	12	42	421467	91.0917	331.695	101.959	1844.44	13.6025	Exhumational
104	CB18-3_122	165	32	42	421467	242.911	131.937	27.0827	66.7648	1.97168	Exhumational
105	CB18-3_123	142	28	40	421467	223.175	129.788	28.311

## Sheet: CB-52
Table S1. Detrital zircon single grain fission-track and U-Pb data
Sample ID	CB-52
Formation	Hemlock Conglomerate
Analyst	Sonia Sanchez
Zeta [a cm-2]	122.673
Zeta Error	8.25757
	Analysis Name	Ns	Ni	n	ρd	U (ppm)	FT age (Ma)	FT 1σ error (Ma)	U-Pb age (Ma)	U-Pb 1σ error (Ma)	Grain Type
1	CB52-3_2	96	20	32	467871	179.5	136.298	34.8139	62.8725	1.0541	Exhumational
2	CB52-3_8	67	35	40	467871	251.3	54.7027	12.0249	72.9201	1.60182	Exhumational
3	CB52-3_13	90	35	42	467871	239.333	73.3747	15.4798	82.7085	1.79236	Magmatic
4	CB52-3_15	177	102	42	467871	697.485	49.6074	7.06434	69.319	2.64447	Exhumational
5	CB52-3_16	28	25	24	467871	299.166	32.0615	9.09889	96.4513	5.06539	Exhumational
6	CB52-3_17	147	31	42	467871	211.981	134.666	28.2112	164.918	3.09134	Exhumational
7	CB52-3_19	97	40	42	467871	273.523	69.2188	13.8671	90.1769	2.06225	Exhumational
8	CB52-3_20	66	51	40	467871	366.18	37.0315	7.36777	195.293	6.44795	Exhumational
9	CB52-3_21	44	28	27	467871	297.837	44.9392	11.3035	351.6	6.5589	Exhumational
10	CB52-3_22	171	51	36	467871	406.866	95.5104	16.6203	121.186	3.86396	Exhumational
11	CB52-3_23	164	56	50	467871	321.664	83.4999	14.1655	59.5452	1.20028	Magmatic
12	CB52-3_26	108	34	40	467871	244.12	90.5187	18.8784	165.266	3.02207	Exhumational
13	CB52-3_27	112	34	42	467871	232.495	93.8469	19.498	182.686	4.52624	Exhumational
14	CB52-3_28	77	125	35	467871	1025.71	17.6535	2.83626	56.805	1.27137	Exhumational
15	CB52-3_29	33	25	24	467871	299.166	37.77	10.3526	154.99	36.9844	Exhumational
16	CB52-3_30	88	41	50	467871	235.504	61.3025	12.349	88.362	1.51305	Exhumational
17	CB52-3_31	49	6	30	467871	57.4399	230.205	100.844	1955.04	21.4052	Exhumational
18	CB52-3_32	81	31	24	467871	370.966	74.5514	16.5748	90.9906	2.13639	Magmatic
19	CB52-3_33	74	16	27	467871	170.192	131.379	37.3539	41.7743	1.46223	Exhumational
20	CB52-3_34	87	28	40	467871	201.04	88.5566	20.2006	76.7874	1.87449	Magmatic
21	CB52-3_35	120	69	20	467871	990.839	49.7167	8.26727	69.9214	1.8194	Exhumational
22	CB52-3_37	75	19	30	467871	181.893	112.296	29.8781	61.6529	1.26167	Magmatic
23	CB52-3_38	137	54	40	467871	387.72	72.3988	12.6736	81.9046	1.36489	Magmatic
24	CB52-3_39	44	18	26	467871	198.831	69.7708	20.1139	155.755	4.03825	Exhumational
25	CB52-3_40	129	60	36	467871	478.666	61.4065	10.5011	65.432	1.78684	Magmatic
26	CB52-3_41	67	26	40	467871	186.68	73.5306	17.7409	75.7083	1.92102	Magmatic
27	CB52-3_42	63	41	24	467871	490.633	43.9462	9.33159	43.4273	1.00275	Magmatic
28	CB52-3_43	62	29	40	467871	208.22	61.0634	14.3775	1912.37	16.4196	Exhumational
29	CB52-3_44	65	16	42	467871	109.409	115.542	33.2293	161.7	4.14404	Exhumational
30	CB52-3_45	32	12	40	467871	86.1599	76.0763	26.2886	58.8911	1.37512	Magmatic
31	CB52-3_46	107	28	24	467871	335.066	108.744	24.288	355.169	5.72042	Exhumational
32	CB52-3_47	86	44	42	467871	300.876	55.8482	11.0547	166.686	2.81044	Exhumational
33	CB52-3_48	68	23	40	467871	165.14	84.2916	21.1587
34	CB52-3_49	63	35	24	467871	418.833	51.4498	11.4202
35	CB52-3_50	67	28	42	467871	191.466	68.3061	16.0868	76.3555	2.07523	Magmatic
36	CB52-3_51	37	32	35	467871	262.583	33.0965	8.31391	81.0595	1.8123	Exhumational
37	CB52-3_52	143	56	36	467871	446.755	72.868	12.5527	368.933	8.32115	Exhumational
38	CB52-3_54	104	22	42	467871	150.438	134.254	32.8567	82.8067	1.8697	Magmatic
39	CB52-3_55	98	33	45	467871	210.613	84.6648	18.0264	60.6916	0.950756	Magmatic
40	CB52-3_56	209	63	49	467871	369.257	94.5071	15.0866	106.971	1.63352	Magmatic
41	CB52-3_57	37	17	24	467871	203.433	62.1589	18.7176	72.4842	1.47409	Magmatic
42	CB52-3_58	177	47	42	467871	321.39	107.178	19.0981	352.669	6.77425	Exhumational
43	CB52-3_60	125	33	25	467871	379.104	107.797	22.3866
44	CB52-3_61	118	67	50	467871	384.848	50.345	8.45817	92.409	6.20568	Exhumational
45	CB52-3_62	160	26	40	467871	186.68	174.225	38.7772	74.3461	1.84279	Exhumational
46	CB52-3_63	115	80	30	467871	765.866	41.1214	6.63332	40.9181	0.969909	Magmatic
47	CB52-3_64	57	36	42	467871	246.171	45.2785	10.1395	180.044	4.69258	Exhumational
48	CB52-3_66	36	33	30	467871	315.92	31.2307	7.83301	75.0402	1.5327	Exhumational
49	CB52-3_67	38	13	21	467871	177.79	83.3443	27.3979
50	CB52-3_68	78	28	18	467871	446.755	79.4517	18.3532	396.754	7.84726	Exhumational
51	CB52-3_69	162	85	50	467871	488.239	54.4636	8.21715	79.9973	2.88519	Exhumational
52	CB52-3_70	98	40	49	467871	234.449	69.9285	13.9909	85.6946	2.45384	Exhumational
53	CB52-3_71	79	129	42	467871	882.113	17.5506	2.78804	61.3727	1.53079	Exhumational
54	CB52-3_72	52	19	40	467871	136.42	78.0662	21.6186	80.4324	2.16708	Magmatic
55	CB52-3_73	69	26	42	467871	177.79	75.7127	18.1994	173.504	3.97338	Exhumational
56	CB52-3_74	26	19	36	467871	151.578	39.1513	12.1254	83.9595	1.87528	Exhumational
57	CB52-1_1	175	53	30	466015	509.407	93.6962	16.0677	61.7473	1.33206	Magmatic
58	CB52-1_2	142	53	40	466015	382.055	76.1316	13.3471			No U-Pb Data
59	CB52-1_3	144	59	40	466015	425.307	69.389	11.7592	77.784	1.44145	Magmatic
60	CB52-1_5	126	56	21	466015	768.916	63.9948	11.198	352.178	8.16274	Exhumational
61	CB52-1_6	151	100	40	466015	720.859	43.0176	6.29999	70.1324	1.32674	Exhumational
62	CB52-1_7	180	82	50	466015	472.884	62.4415	9.38206	78.3918	1.86706	Exhumational
63	CB52-1_8	93	58	42	466015	398.189	45.6704	8.27373	88.8676	1.53206	Exhumational
64	CB52-1_9	162	37	21	466015	508.034	123.951	24.1706	60.0698	1.28885	Exhumational
65	CB52-1_10	33	25	30	466015	240.286	37.6206	10.3116	285.698	8.26873	Exhumational
66	CB52-1_11	167	88	28	466015	906.223	54.0172	8.04425	86.7562	2.09847	Exhumational
67	CB52-1_12	77	60	20	466015	865.031	36.5785	6.79211	71.9927	2.19627	Exhumational
68	CB52-1_13	153	64	28	466015	659.071	67.9734	11.1664	63.0473	1.41546	Magmatic
69	CB52-1_14	182	73	40	466015	526.227	70.8726	10.9838	361.597	5.36906	Exhumational
70	CB52-1_15	108	56	16	466015	1009.2	54.8915	9.81037	61.8332	0.998366	Magmatic
71	CB52-1_17	193	67	24	466015	804.959	81.8169	12.9188	101.396	2.71985	Exhumational
72	CB52-1_18	103	18	16	466015	324.387	161.522	42.7622	170.109	13.7879	Magmatic
73	CB52-1_20	137	64	25	466015	738.16	60.8986	10.1446	243.186	8.0923	Exhumational
74	CB52-1_21	98	46	24	466015	552.659	60.61	11.6221	102.593	1.83728	Exhumational
75	CB52-1_22	61	37	25	466015	426.749	46.9532	10.3132	1942.29	16.7532	Exhumational
76	CB52-1_23	119	20	24	466015	240.286	167.869	42.2112	59.2143	1.29466	Exhumational
77	CB52-1_24	136	66	28	466015	679.667	58.6324	9.69298	201.613	4.16554	Exhumational
78	CB52-1_25	93	53	28	466015	545.793	49.9623	9.27284	59.6545	1.07094	Exhumational
79	CB52-1_26	45	23	40	466015	165.798	55.6836	14.7877			No U-Pb Data
80	CB52-1_27	113	32	20	466015	461.35	100.154	21.2283	161.998	3.0568	Exhumational
81	CB52-1_28	80	36	28	466015	370.728	63.2086	13.4239	110.517	3.72669	Exhumational
82	CB52-1_29	151	46	35	466015	378.966	93.153	16.97	61.0514	1.14188	Magmatic
83	CB52-1_30	157	24	25	466015	276.81	184.325	42.3794	101.807	1.36868	Magmatic
84	CB52-1_33	141	99	25	466015	1141.84	40.5822	6.02187	96.4981	2.60094	Exhumational
85	CB52-1_35	84	35	36	466015	280.334	68.2386	14.524	1884.41	17.009	Exhumational
86	CB52-1_36	68	23	35	466015	189.483	83.9594	21.0753	81.7131	1.35418	Magmatic
87	CB52-1_38	107	65	35	466015	535.495	46.8824	8.05994	87.4829	1.96234	Exhumational
88	CB52-1_39	146	63	28	466015	648.773	65.9037	10.9384	60.21	1.50844	Magmatic
89	CB52-1_41	76	48	35	466015	395.443	45.0995	8.88549	80.3443	1.86721	Exhumational
90	CB52-1_43	163	45	30	466015	432.515	102.714	18.7105	107.059	2.23623	Magmatic
91	CB52-1_44	121	49	30	466015	470.961	70.2008	12.8485	60.9675	1.17394	Magmatic
92	CB52-1_45	98	49	30	466015	470.961	56.9155	10.7143	66.1116	1.82763	Magmatic
93	CB52-1_46	120	64	28	466015	659.071	53.373	9.05516	69.243	1.27389	Exhumational
94	CB52-1_47	35	10	24	466015	120.143	99.2749	36.2587	163.514	3.56431	Exhumational
95	CB52-1_48	141	104	28	466015	1070.99	38.637	5.66965	61.1636	1.10653	Exhumational
96	CB52-1_49	170	106	40	466015	764.111	45.6796	6.48294	58.633	1.00416	Exhumational
97	CB52-1_50	112	34	35	466015	280.105	93.4773	19.4212	84.2592	1.58125	Magmatic
98	CB52-1_51	177	60	40	466015	432.515	83.7754	13.8018	99.3414	3.43795	Exhumational
99	CB52-1_52	78	36	30	466015	346.012	61.6359	13.1364	104.413	1.78096	Exhumational
100	CB52-1_53	77	33	35	466015	271.867	66.3528	14.5547	76.7885	2.10854	Magmatic
101	CB52-1_54	134	35	40	466015	252.301	108.517	21.9353	387.749	9.42672	Exhumational
102	CB52-1_56	174	65	36	466015	520.62	76.066	12.2552	61.4965	1.28948	Magmatic
103	CB52-1_58	160	83	25	466015	957.301	54.8671	8.34335	60.5052	1.18509	Magmatic
104	CB52-1_59	230	33	40	466015	237.883	196.204	38.9831	186.892	2.84894	Magmatic
105	CB52-1_60	64	31	40	466015	223.466	58.7432	13.4865	124.395	4.62215	Exhumational

## Sheet: CB-51
Table S1. Detrital zircon single grain fission-track and U-Pb data
Sample ID	CB-51
Formation	Hemlock Conglomerate
Analyst	Sonia Sanchez
Zeta [a cm-2]	122.673
Zeta Error	8.25757
	Analysis Name	Ns	Ni	n	ρd	U (ppm)	FT age (Ma)	FT 1σ error (Ma)	U-Pb age (Ma)	U-Pb 1σ error (Ma)	Grain Type
1	CB51-3_3	101	29	32	465087	261.833	98.5943	21.8713
2	CB51-3_6	88	66	40	465087	476.716	37.924	6.7138
3	CB51-3_7	159	53	30	465087	510.424	85.0174	14.7212	99.054	1.70318	Magmatic
4	CB51-3_9	106	42	20	465087	606.73	71.5972	13.9695	60.2165	1.13089	Magmatic
5	CB51-3_12	87	32	40	465087	231.135	77.0945	16.8147	79.7852	1.46783	Magmatic
6	CB51-3_14	171	27	25	465087	312.033	178.185	38.9204	200.139	3.93551	Magmatic
7	CB51-3_14b	122	68	35	465087	561.328	50.9784	8.4888	77.4323	2.48662	Exhumational
8	CB51-3_15	49	15	27	465087	160.511	92.5206	28.0477	37.6023	0.89778	Magmatic
9	CB51-3_17	65	27	30	465087	260.027	68.3125	16.3447	1121.25	17.0611	Exhumational
10	CB51-3_18	83	26	36	465087	208.664	90.4292	21.2721	1896.4	17.6943	Exhumational
11	CB51-3_19	110	35	40	465087	252.804	89.0381	18.353
12	CB51-3_20	100	28	28	465087	288.919	101.085	22.725
13	CB51-3_21	191	66	27	465087	706.246	82.0308	13.0253	118.607	6.81319	Exhumational
14	CB51-3_22	128	44	25	465087	508.497	82.4576	15.5067	1355.84	19.9962	Exhumational
15	CB51-3_23	45	16	24	465087	192.613	79.7366	23.8608
16	CB51-3_24	224	34	28	465087	350.83	185.254	36.4445
17	CB51-3_26	136	21	25	465087	242.692	182.148	44.5416
18	CB51-3_27	85	49	30	465087	471.901	49.2964	9.48214	61.0229	1.50769	Exhumational
19	CB51-3_29	113	56	36	465087	449.43	57.3076	10.1763	54.1947	0.953338	Magmatic
20	CB51-3_34	105	51	24	465087	613.953	58.4658	10.7738	336.089	5.50301	Exhumational
21	CB51-3_35	49	25	42	465087	171.976	55.6715	14.219
22	CB51-3_36	81	18	16	465087	325.034	127.109	34.2787
23	CB51-3_37	67	30	40	465087	216.689	63.3972	14.6067
24	CB51-3_38	126	52	24	465087	625.991	68.7548	12.2978
25	CB51-3_39	73	15	32	465087	135.431	137.357	40.091
26	CB51-3_40	137	47	36	465087	377.2	82.621	15.0999
27	CB51-3_41b	217	81	36	465087	650.068	75.9743	11.2122
28	CB51-3_42	229	60	32	465087	541.723	107.968	17.3621
29	CB51-3_43	52	80	16	465087	1444.6	18.5158	3.54017
30	CB51-3_44	57	25	40	465087	180.574	64.7153	16.1619
31	CB51-3_45	56	28	30	465087	269.658	56.8027	13.7266
32	CB51-3_46	71	59	25	465087	681.849	34.2378	6.48345
33	CB51-3_47	121	54	36	465087	433.379	63.6064	11.3084
34	CB51-3_48	65	32	28	465087	330.193	57.6863	13.086
35	CB51-3_49	44	24	40	465087	173.351	52.0882	13.7042
36	CB51-3_50	92	23	20	465087	332.257	113.109	27.5145	1936.04	35.4841	Exhumational
37	CB51-3_52	94	90	42	465087	619.112	29.726	4.84589	54.0538	1.2235	Exhumational
38	CB51-3_54	86	34	40	465087	245.581	71.7553	15.3672	80.6977	1.72192	Magmatic
39	CB51-3_55	80	18	35	465087	148.587	125.555	33.8955	74.5432	1.75002	Magmatic
40	CB51-3_56	108	26	25	465087	300.476	117.42	26.9162	105.251	2.19738	Magmatic
41	CB51-3_57	100	32	36	465087	256.817	88.5356	19.0044
42	CB51-3_59	65	12	16	465087	216.689	152.698	49.1353
43	CB51-3_60	68	24	20	465087	346.703	80.3235	19.8706	76.3623	1.71005	Magmatic
44	CB51-3_61	114	44	25	465087	508.497	73.49	14.0065	67.7671	1.73142	Magmatic
45	CB51-3_62	132	73	20	465087	1054.55	51.3775	8.30027	93.9947	2.04152	Exhumational
46	CB51-3_63	41	12	16	465087	216.689	96.7373	32.4537
47	CB51-3_64	72	18	20	465087	260.027	113.109	30.8251	343.632	4.84915	Exhumational
48	CB51-3_65	83	36	16	465087	650.068	65.437	13.8274
49	CB51-3_66	104	42	25	465087	485.384	70.2537	13.74	59.9958	1.42031	Magmatic
50	CB51-3_67	184	58	40	465087	418.933	89.8696	14.9036	72.7598	2.50265	Magmatic
51	CB51-3_68	113	35	40	465087	252.804	91.4492	18.7964	109.567	3.34502	Magmatic
52	CB51-1_3b	92	18	40	463231	130.535	143.61	38.3337	1874.93	15.0113	Exhumational
53	CB51-1_5	154	36	30	463231	348.092	120.413	23.8091
54	CB51-1_9	133	73	30	463231	705.853	51.5594	8.32056	358.768	7.16636	Exhumational
55	CB51-1_10	117	42	21	463231	580.153	78.6685	15.1694	322.251	8.74176	Exhumational
56	CB51-1_11	167	55	24	463231	664.759	85.7	14.593	99.0661	2.96264	Magmatic
57	CB51-1_12	104	36	16	463231	652.673	81.5638	16.7591	68.4386	1.75785	Magmatic
58	CB51-1_15	191	15	24	463231	181.298	352.005	97.5047	2068.65	14.3977	Exhumational
59	CB51-1_16	110	32	20	463231	464.123	96.9372	20.6015	159.73	3.53527	Exhumational
60	CB51-1_17	73	53	21	463231	732.098	39.0165	7.54464	29.4093	2.03587	Magmatic
61	CB51-1_20	87	31	30	463231	299.746	79.2505	17.4671	355.243	6.59157	Exhumational
62	CB51-1_22	73	26	32	463231	235.687	79.2854	18.9267	75.5873	1.52295	Magmatic
63	CB51-1_23	163	44	30	463231	425.446	104.407	19.1631	58.2429	2.21868	Exhumational
64	CB51-1_24	139	44	36	463231	354.538	89.1401	16.6162	262.53	4.18086	Exhumational
65	CB51-1_28	167	57	18	463231	918.576	82.7122	13.9284	111.263	2.04088	Exhumational
66	CB51-1_29	239	45	24	463231	543.894	149.166	26.3613	104.774	2.80167	Exhumational
67	CB51-1_30	45	25	16	463231	453.245	50.9416	13.1906	39.5588	1.02726	Magmatic
68	CB51-1_31	141	49	25	463231	568.55	81.2457	14.6075	365.422	8.20968	Exhumational
69	CB51-1_33	102	32	40	463231	232.061	89.9361	19.2639	356.803	7.81419	Exhumational
70	CB51-1_35	83	23	36	463231	185.327	101.727	24.9909	352.627	8.69383	Exhumational
71	CB51-1_36	150	49	18	463231	789.653	86.397	15.4311	97.1613	2.2271	Magmatic
72	CB51-1_37	100	68	28	463231	704.472	41.649	7.15725	59.8178	1.22929	Exhumational
73	CB51-1_38	98	26	16	463231	471.375	106.215	24.5656	1835.33	16.759	Exhumational
74	CB51-1_39	130	31	24	463231	374.682	118.064	24.9826	2688	11.2745	Exhumational
75	CB51-1_40	117	44	30	463231	425.446	75.1134	14.2715	89.6725	2.11581	Exhumational
76	CB51-1_41	154	71	30	463231	686.515	61.3354	9.77594	57.1779	1.32022	Magmatic
77	CB51-1_42	99	46	25	463231	533.741	60.8615	11.6539	60.9628	1.15483	Magmatic
78	CB51-1_43	72	40	30	463231	386.769	50.9416	10.6509	36.7929	0.931981	Magmatic
79	CB51-1_44	128	23	30	463231	222.392	156.216	37.0059	2548.29	19.0016	Exhumational
80	CB51-1_45	135	63	24	463231	761.451	60.5992	10.1594	58.2951	1.47958	Magmatic
81	CB51-1_48	114	70	40	463231	507.634	46.1073	7.69911	388.539	7.51401	Exhumational
82	CB51-1_51	74	40	25	463231	464.123	52.3509	10.8984	74.6557	1.9711	Exhumational
83	CB51-1_53	114	48	25	463231	556.947	67.1301	12.4563	68.2022	1.20727	Magmatic
84	CB51-1_54	254	76	28	463231	787.351	94.2666	13.9567	117.76	2.41953	Exhumational
85	CB51-1_56	144	56	20	463231	812.215	72.651	12.5051	68.051	1.50384	Magmatic
86	CB51-1_58	101	56	25	463231	649.772	51.0422	9.2136	99.8494	2.11453	Exhumational
87	CB51-1_59	154	26	40	463231	188.55	166.133	37.0669	1860.41	13.635	Exhumational
88	CB51-1_61	185	41	25	463231	475.726	126.947	23.6207	221.826	5.70495	Exhumational
89	CB51-1_62	154	91	25	463231	1055.88	47.9051	7.15504	99.1097	2.06536	Exhumational
90	CB51-1_63	161	36	36	463231	290.077	125.833	24.7909	1937.19	17.4927	Exhumational
91	CB51-1_64	154	36	20	463231	522.138	120.413	23.8091	93.5106	1.97504	Magmatic
92	CB51-1_65	168	50	40	463231	362.596	94.7677	16.6257	362.597	8.17075	Exhumational
93	CB51-1_66	50	31	16	463231	562.024	45.6653	10.9104	98.4024	2.60638	Exhumational
94	CB51-1_67	136	63	30	463231	609.161	61.046	10.2243	321.168	8.992	Exhumational
95	CB51-1_69	176	33	20	463231	478.627	149.782	30.2584	106.984	1.97502	Magmatic
96	CB51-1_70	90	29	40	463231	210.306	87.5806	19.6656	89.2582	1.93702	Magmatic
97	CB51-1_71	129	68	24	463231	821.884	53.677	8.86619	59.7872	1.52943	Magmatic
98	CB51-1_72	74	27	40	463231	195.802	77.406	18.2153	57.2129	1.25899	Magmatic
99	CB51-1_73	68	29	24	463231	350.509	66.2816	15.4045	96.15	1.59401	Exhumational
100	CB51-1_74	153	56	30	463231	541.477	77.1647	13.1901	1085.72	22.1532	Exhumational
101	CB51-1_75	182	46	20	463231	667.176	111.448	19.9548	99.6906	2.91998	Magmatic
102	CB51-1_76	182	35	25	463231	406.107	146.08	28.8083	1970.6	15.6871	Exhumational
103	CB51-1_77	111	63	21	463231	870.23	49.8676	8.59512	98.6722	2.14823	Exhumational
104	CB51-1_80	186	55	36	463231	443.173	95.3785	16.0689	92.0495	1.77222	Magmatic
105	CB51-1_81	156	87	20	463231	1261.83	50.7471	7.65088	65.0199	1.13965	Exhumational

## Sheet: CB-50
Table S1. Detrital zircon single grain fission-track and U-Pb data
Sample ID	CB-50
Formation	Hemlock Conglomerate
Analyst	Sonia Sanchez
Zeta [a cm-2]	122.673
Zeta Error	8.25757
	Analysis Name	Ns	Ni	n	ρd	U (ppm)	FT age (Ma)	FT 1σ error (Ma)	U-Pb age (Ma)	U-Pb 1σ error (Ma)	Grain Type
1	CB50-1_2	85	53	28	462303	550.176	45.317	8.53335	107.637	2.61305	Exhumational
2	CB50-1_3	86	60	24	462303	726.648	40.5161	7.37349	62.916	2.4288	Exhumational
3	CB50-1_4	86	51	30	462303	494.12	47.6396	9.04667	73.4194	2.25694	Exhumational
4	CB50-1_6	112	34	16	462303	617.651	92.738	19.2676
5	CB50-1_7	64	35	36	462303	282.585	51.6437	11.4344	76.108	2.30295	Exhumational
6	CB50-1_8	57	16	16	462303	290.659	100.235	29.2009
7	CB50-1_9	232	77	40	462303	559.519	84.8753	12.6241	366.447	7.34463	Exhumational
8	CB50-1_10	71	36	35	462303	298.964	55.6833	12.0317	79.6231	2.04612	Exhumational
9	CB50-1_11	80	28	18	462303	452.136	80.5125	18.5423	397.777	23.803	Exhumational
10	CB50-1_12	139	41	24	462303	496.543	95.4242	18.2083
11	CB50-1_13	98	39	20	462303	566.785	70.8628	14.2909
12	CB50-1_18	59	53	20	462303	770.247	31.4891	6.34821
13	CB50-1_19	119	36	36	462303	290.659	93.0577	18.8443	336.886	6.46889	Exhumational
14	CB50-1_20	145	45	20	462303	653.983	90.7281	16.7157	126.919	6.8473	Exhumational
15	CB50-1_22	186	51	36	462303	411.767	102.596	17.7136	108.794	3.01566	Magmatic
16	CB50-1_23	71	28	20	462303	406.923	71.5048	16.712	1878.43	16.0254	Exhumational
17	CB50-1_24	218	25	35	462303	207.614	242.641	53.9366	369.972	10.6057	Exhumational
18	CB50-1_26	105	14	30	462303	135.641	209.238	61.2814	157.278	3.82866	Magmatic
19	CB50-1_27	35	24	16	462303	435.989	41.2205	11.2935	196.169	69.7941	Exhumational
20	CB50-1_28	30	12	20	462303	174.395	70.5032	24.5744	26.1234	1.7625	Magmatic
21	CB50-1_29	143	22	25	462303	255.78	181.729	43.491	2263.12	46.2085	Exhumational
22	CB50-1_30	111	75	40	462303	544.986	41.8309	6.89486	92.9988	2.17404	Exhumational
23	CB50-1_31	153	67	20	462303	973.708	64.4303	10.4462	92.3002	2.89295	Exhumational
24	CB50-1_32	26	14	25	462303	162.769	52.4473	17.7637	1887.92	18.6238	Exhumational
25	CB50-1_33	76	36	35	462303	298.964	59.5865	12.7467	102.867	2.18849	Exhumational
26	CB50-1_35	169	72	24	462303	871.977	66.2167	10.3923
27	CB50-1_37	137	54	30	462303	523.186	71.5419	12.5236	161.398	9.59118	Exhumational
28	CB50-1_38	68	37	20	462303	537.719	51.9043	11.1996	81.3639	2.7561	Exhumational
29	CB50-1_39	69	32	20	462303	465.055	60.8546	13.6846	171.803	4.79906	Exhumational
30	CB50-1_40	77	21	24	462303	254.327	103.143	26.3835
31	CB50-1_41	265	95	36	462303	767.017	78.6172	10.8723	126.285	9.71047	Exhumational
32	CB50-1_43	66	20	20	462303	290.659	92.9024	24.5756	1894.95	15.943	Exhumational
33	CB50-1_45	98	55	36	462303	444.062	50.3284	9.17184	55.3585	1.05032	Magmatic
34	CB50-1_47	156	61	25	462303	709.208	72.1123	11.9865	111.317	4.61768	Exhumational
35	CB50-1_51	59	66	36	462303	532.875	25.2989	4.86148	25.5165	0.702593	Magmatic
36	CB50-1_52	19	3	16	462303	54.4986	177.133	110.731	163.736	5.85102	Magmatic
37	CB50-1_53	69	22	16	462303	399.656	88.3271	22.4797
38	CB50-1_54	190	45	24	462303	544.986	118.627	21.3236	367.232	13.7996	Exhumational
39	CB50-1_55	217	8	25	462303	93.0109	726.629	266.42
40	CB50-1_56	141	43	30	462303	416.611	92.3173	17.3138	103.979	2.94577	Magmatic
41	CB50-1_57	104	42	24	462303	508.653	69.8354	13.6582	110.931	4.11278	Exhumational
42	CB50-1_58	27	18	36	462303	145.33	42.3944	13.2321	154.248	4.51766	Exhumational
43	CB50-1_60	169	32	16	462303	581.318	148.043	30.3371
44	CB50-1_61	151	38	20	462303	552.252	111.705	21.7075	221.418	17.4234	Exhumational
45	CB50-1_63	204	59	40	462303	428.722	97.3066	15.8931	355.207	7.97395	Exhumational
46	CB50-1_66	139	38	36	462303	306.807	102.898	20.1469	363.087	7.30085	Exhumational
47	CB50-1_67	115	51	25	462303	592.944	63.6251	11.5806	2333.48	15.4857	Exhumational
48	CB50-1_68	94	22	16	462303	399.656	120.033	29.6262	387.289	11.717	Exhumational
49	CB50-1_70	104	21	30	462303	203.461	138.922	34.6081
50	CB50-1_72	146	72	28	462303	747.409	57.2449	9.15269	132.564	6.86248	Exhumational
51	CB50-1_75	114	25	20	462303	363.324	128.024	29.639	182.395	5.73506	Exhumational
52	CB50-1_77	38	28	30	462303	271.282	38.3688	9.92081	28.0463	0.688869	Magmatic
53	CB50-1_78	34	40	25	462303	465.055	24.0577	5.85533	118.318	10.2909	Exhumational
54	CB50-1_79	51	28	20	462303	406.923	51.4427	12.6163
55	CB50-1_82	187	47	24	462303	569.207	111.845	19.8347	101.967	3.15493	Magmatic
56	CB50-1_83	80	19	30	462303	184.084	118.302	31.2901
57	CB50-1_84	98	29	16	462303	526.82	95.1187	21.1652
58	CB50-1_87	77	30	20	462303	435.989	72.3728	16.3674	70.019	2.41212	Magmatic
59	CB50-1_88	277	108	40	462303	784.779	72.3209	9.62027	86.6771	3.32992	Exhumational
60	CB50-1_89	70	35	36	462303	282.585	56.4641	12.3297	75.7667	1.53716	Exhumational
61	CB50-1_92	190	18	25	462303	209.275	292.574	74.9607
62	CB50-1_95	88	55	36	462303	444.062	45.2108	8.38181	68.9715	2.37048	Exhumational
63	CB50-1_96	111	51	32	462303	463.238	61.4226	11.2325	356.291	6.94865	Exhumational
64	CB50-1_97	145	44	42	462303	304.5	92.7753	17.2196	62.8016	1.96134	Magmatic
65	CB50-1_98	107	45	35	462303	373.705	67.0742	12.7958	225.105	18.4174	Exhumational
66	CB50-1_102	94	11	25	462303	127.89	237.873	77.5819	2690.02	24.3799	Exhumational
67	CB50-1_103	145	30	25	462303	348.791	135.618	28.7866	372.1	8.78421	Exhumational
68	CB50-1_104	72	23	30	462303	222.839	88.1612	21.986	104.165	2.34289	Magmatic
69	CB50-1_108	89	17	16	462303	308.825	146.769	40.1635	2379.25	83.6445	Exhumational
70	CB50-1_109	114	60	35	462303	498.273	53.6526	9.33372	72.954	1.92764	Exhumational
71	CB50-1_110	30	35	32	462303	317.908	24.2595	6.26676	41.2913	1.1946	Exhumational
72	CB50-1_112	122	74	24	462303	896.199	46.5805	7.58787	76.6865	3.25851	Exhumational
73	CB50-1_116	138	90	24	462303	1089.97	43.3333	6.59792	87.9413	8.35402	Exhumational
74	CB50-1_118	95	18	28	462303	186.852	147.946	39.3958
75	CB50-1_122	85	23	24	462303	278.548	103.952	25.4773
76	CB50-1_123	230	89	40	462303	646.716	72.8663	10.4098	151.886	13.3535	Exhumational
77	CB50-1_128	76	26	30	462303	251.905	82.3586	19.5669	363.686	7.68396	Exhumational
78	CB50-1_129	121	59	32	462303	535.903	57.8932	10.0339	107.862	2.63682	Exhumational
79	CB50-1_132	54	36	24	462303	435.989	42.3944	9.58542	65.3947	2.6224	Exhumational
80	CB50-1_133	110	72	49	462303	427.091	43.1768	7.1997	68.1562	1.73581	Exhumational
81	CB50-1_134	72	34	30	462303	329.414	59.7702	13.1122	158.82	19.5893	Exhumational
82	CB50-1_137	32	17	30	462303	164.707	53.1563	16.3752	79.586	1.66985	Exhumational
83	CB50-1_138	201	32	35	462303	265.745	175.696	35.5976	205.19	6.70348	Magmatic
84	CB50-1_139	96	34	30	462303	329.414	79.5711	16.8145	107.698	3.34998	Exhumational
85	CB50-1_140	169	94	25	462303	1092.88	50.78	7.42518	84.9364	5.87806	Exhumational
86	CB50-1_141	56	26	25	462303	302.285	60.7871	15.031
87	CB50-1_143	79	25	24	462303	302.77	88.9881	21.3356
88	CB50-1_145	26	3	20	462303	43.5989	241.184	148.013	176.287	8.82795	Magmatic
89	CB50-1_146	122	39	40	462303	283.393	88.0989	17.3229	367.312	7.36068	Exhumational
90	CB50-1_151	95	47	32	462303	426.906	57.0621	10.9209	72.4381	1.61012	Exhumational
91	CB50-1_154	40	20	24	462303	242.216	56.4641	15.953
92	CB50-1_155	120	71	30	462303	687.893	47.7485	7.88115	144.208	12.9185	Exhumational
93	CB50-1_157	168	12	25	462303	139.516	385.242	118.183
94	CB50-1_158	93	29	24	462303	351.213	90.2996	20.2039	361.944	6.38666	Exhumational

## Sheet: CB-16
Table S1. Detrital zircon single grain fission-track and U-Pb data
Sample ID	CB-16
Formation	Tyonek Fm.
Analyst	Sonia Sanchez
Zeta [a cm-2]	122.673
Zeta Error	8.25757
	Analysis Name	Ns	Ni	n	ρd	U (ppm)	FT age (Ma)	FT 1σ error (Ma)	U-Pb age (Ma)	U-Pb 1σ error (Ma)	Grain Type
1	CB16-3_2	80	32	20	415898	516.944	63.461	13.9867	61.3942	0.948765	Magmatic
2	CB16-3_4	142	62	40	415898	500.789	58.1624	9.73188	63.3204	1.26779	Magmatic
3	CB16-3_5	72	19	30	415898	204.624	95.951	25.6291	86.6993	2.14825	Magmatic
4	CB16-3_6	74	37	50	415898	239.086	50.8187	10.824	98.8467	2.16216	Exhumational
5	CB16-3_7	180	89	30	415898	958.5	51.3874	7.55535	64.2605	1.5698	Exhumational
6	CB16-3_8	37	18	35	415898	166.161	52.2246	15.4401	87.1215	2.28034	Exhumational
7	CB16-3_10	41	36	42	415898	276.934	28.9875	6.92028	36.3505	0.999263	Exhumational
8	CB16-3_11	81	30	32	415898	302.897	68.511	15.3966	102.258	2.27579	Exhumational
9	CB16-3_12	127	45	42	415898	346.168	71.5952	13.3793	82.1675	1.85903	Magmatic
10	CB16-3_13	47	18	25	415898	232.625	66.2671	18.9363	84.7748	2.1493	Magmatic
11	CB16-3_15	141	37	36	415898	332.065	96.4872	19.0412	64.1546	1.45371	Magmatic
12	CB16-3_16	136	69	40	415898	557.33	50.085	8.17955	74.8079	2.44375	Exhumational
13	CB16-3_17	62	50	42	415898	384.631	31.5547	6.38581	35.9765	1.08769	Magmatic
14	CB16-3_18	99	46	42	415898	353.86	54.669	10.4682	90.4228	1.85292	Exhumational
15	CB16-3_19	189	97	42	415898	746.184	49.5139	7.07648	39.2073	0.790966	Magmatic
16	CB16-3_20	76	25	42	415898	192.315	77.0869	18.5623	84.2977	2.54705	Magmatic
17	CB16-3_21	51	32	42	415898	246.164	40.5285	9.56364	83.9497	1.99635	Exhumational
18	CB16-3_22	129	38	32	415898	383.669	86.0224	16.9648	61.376	1.48586	Magmatic
19	CB16-3_23	119	49	42	415898	376.938	61.6565	11.308	43.9659	1.02039	Magmatic
20	CB16-3_24	105	36	36	415898	323.09	73.9774	15.1838	77.4879	2.38365	Magmatic
21	CB16-3_25	99	36	50	415898	232.625	69.7729	14.4186	86.5062	1.81874	Exhumational
22	CB16-3_26	118	42	42	415898	323.09	71.2748	13.7303	83.6415	2.29775	Magmatic
23	CB16-3_27	113	59	28	415898	680.796	48.6735	8.51775	65.2241	1.3935	Exhumational
24	CB16-3_28	194	56	30	415898	603.101	87.7729	14.6445	37.9858	1.51032	Exhumational
25	CB16-3_29	129	57	40	415898	460.403	57.4756	9.97518	85.6831	1.7272	Exhumational
26	CB16-3_30	104	36	42	415898	276.934	73.2768	15.0563	63.4413	1.56825	Magmatic
27	CB16-3_31	122	35	35	415898	323.09	88.3121	18.0108	81.2028	2.37846	Magmatic
28	CB16-3_32	80	21	42	415898	161.545	96.4549	24.5808	74.986	1.74379	Magmatic
29	CB16-3_33	109	58	50	415898	374.784	47.7634	8.44226	36.9499	1.16667	Magmatic
30	CB16-3_34	29	12	30	415898	129.236	61.3557	21.4869	82.0277	1.91525	Magmatic
31	CB16-3_35	79	27	36	415898	242.317	74.2109	17.328	98.0678	2.22312	Exhumational
32	CB16-3_36	57	19	28	415898	219.24	76.0786	20.8351	83.1546	2.38995	Magmatic
33	CB16-3_37	110	32	40	415898	258.472	87.0988	18.5106	82.9798	3.74701	Magmatic
34	CB16-3_38	114	69	36	415898	619.256	42.0094	7.04083	66.8966	1.85895	Exhumational
35	CB16-3_39	68	31	42	415898	238.471	55.7154	12.6793	84.0343	1.73816	Exhumational
36	CB16-3_40	106	39	42	415898	300.012	68.964	13.7756	60.8509	1.66261	Magmatic
37	CB16-3_41	76	28	42	415898	215.393	68.8716	15.9594	67.9963	1.89711	Magmatic
38	CB16-3_42	53	20	35	415898	184.623	67.2489	18.2557	96.5657	2.56002	Exhumational
39	CB16-3_43	44	35	40	415898	282.704	31.9899	7.57858	103.032	3.58769	Exhumational
40	CB16-3_44	118	44	36	415898	394.888	68.0521	12.9169	96.0191	2.22718	Exhumational
41	CB16-3_45	46	26	50	415898	168.007	44.9754	11.4688	102.242	2.7166	Exhumational
42	CB16-3_46	131	34	20	415898	549.253	97.5459	19.9602	96.5634	2.38598	Magmatic
43	CB16-3_47	126	52	36	415898	466.685	61.5177	11.0034	61.3371	2.45188	Magmatic
44	CB16-3_49	60	37	42	415898	284.627	41.235	9.08287	104.629	2.30253	Exhumational
45	CB16-3_50	89	41	25	415898	529.867	55.1384	11.0898	89.3404	2.81907	Exhumational
46	CB16-3_52	28	15	25	415898	193.854	47.4432	15.534	83.9814	2.48908	Exhumational
47	CB16-3_53	139	61	35	415898	563.099	57.8683	9.7544	97.412	2.26465	Exhumational
48	CB16-3_54	58	40	28	415898	461.557	36.8834	8.00183	105.085	2.48677	Exhumational
49	CB16-3_55	77	31	42	415898	238.471	63.0536	14.1092	82.9492	2.51	Exhumational
50	CB16-3_56	61	32	28	415898	369.246	48.4455	11.097	85.2195	2.47458	Exhumational
51	CB16-3_57	67	28	40	415898	226.163	60.754	14.3082	95.0824	2.0438	Exhumational
52	CB16-3_58	99	38	28	415898	438.479	66.1194	13.4277	64.4003	1.94125	Magmatic
53	CB16-3_59	234	147	42	415898	1130.81	40.48	5.10461	39.0721	0.810815	Magmatic
54	CB16-3_60	21	11	28	415898	126.928	48.5174	18.3697	83.1281	2.53853	Exhumational
55	CB16-3_61	156	103	40	415898	831.956	38.5208	5.57482	54.9812	1.07956	Exhumational
56	CB16-3_62	116	35	50	415898	226.163	83.997	17.2179	74.7831	1.62521	Magmatic
57	CB16-3_63	45	18	32	415898	181.738	63.461	18.2392	82.4034	1.94055	Exhumational
58	CB16-3_64	111	38	30	415898	409.247	74.088	14.8454	97.7974	1.73283	Exhumational
59	CB16-3_65	64	28	50	415898	180.93	58.0459	13.7564	104.638	2.38779	Exhumational
60	CB16-3_67	81	36	36	415898	323.09	57.1429	12.115	84.5215	1.94906	Exhumational
61	CB16-3_68	52	26	40	415898	210.008	50.8187	12.7065	105.509	3.82774	Exhumational
62	CB16-3_69	176	62	35	415898	572.331	72.0111	11.7527	63.3146	1.50667	Magmatic
63	CB16-3_71	101	42	24	415898	565.407	61.0549	11.9854	63.7581	1.53593	Magmatic
64	CB16-3_72	174	59	20	415898	953.115	74.7966	12.4085	62.522	1.44364	Magmatic
65	CB16-3_73	73	29	40	415898	234.24	63.8965	14.711	84.4546	1.51299	Exhumational
66	CB16-3_74	95	45	25	415898	581.562	53.6302	10.3957	61.735	1.27705	Magmatic
67	CB16-3_75	97	38	16	415898	767.338	64.7903	13.1909	101.609	1.73578	Exhumational
68	CB16-3_76	93	47	42	415898	361.553	50.2802	9.65259	63.0902	1.34329	Exhumational
69	CB16-3_77	51	28	42	415898	215.393	46.2975	11.3545	99.8475	1.95682	Exhumational
70	CB16-3_78	52	18	40	415898	145.39	73.2768	20.6755	82.581	1.8231	Magmatic
71	CB16-3_79	30	13	21	415898	200.008	58.6015	19.8798	63.9033	1.36417	Magmatic
72	CB16-3_80	83	35	40	415898	282.704	60.2125	12.836	84.9336	1.89572	Exhumational
73	CB16-1_2	38	29	25	414042	376.464	33.1918	8.50281	58.1151	1.4539	Exhumational
74	CB16-1_3	33	17	40	414042	137.929	49.1104	15.0531	84.7795	1.48449	Exhumational
75	CB16-1_4	102	53	25	414042	688.021	48.6908	8.91153	86.7252	1.8499	Exhumational
76	CB16-1_5	228	49	25	414042	636.095	117.099	20.1531	54.1484	1.15543	Exhumational
77	CB16-1_6	161	65	30	414042	703.166	62.5988	10.1752	38.4636	0.851739	Exhumational
78	CB16-1_8	26	10	20	414042	162.269	65.6935	24.8671	89.3727	1.35748	Magmatic
79	CB16-1_9	55	12	30	414042	129.815	115.36	37.6187	83.506	1.74525	Magmatic
80	CB16-1_7	158	66	27	414042	793.316	60.5114	9.81444	63.2406	1.24773	Magmatic
81	CB16-1_10	55	16	36	414042	144.239	86.7126	25.3562	95.2621	1.81295	Magmatic
82	CB16-1_12	70	28	42	414042	216.359	63.1792	14.7933	101.401	2.939	Exhumational
83	CB16-1_13	221	61	42	414042	471.353	91.3577	14.6583	77.3982	2.06971	Magmatic
84	CB16-1_14	144	32	49	414042	211.943	113.28	23.4958	81.7585	1.90521	Magmatic
85	CB16-1_15	62	25	24	414042	338.061	62.6762	15.4741	82.467	1.77507	Exhumational
86	CB16-1_18	96	30	24	414042	405.673	80.7589	17.7992	81.0293	1.21515	Magmatic
87	CB16-1_18b	107	40	49	414042	264.929	67.5786	13.375	100.343	2.30738	Exhumational
88	CB16-1_20	63	44	30	414042	475.99	36.2601	7.5562	100.993	2.36093	Exhumational
89	CB16-1_21	56	55	32	414042	557.8	25.8059	5.21666	94.0658	1.58761	Exhumational
90	CB16-1_22	100	32	40	414042	259.631	78.8777	16.9313	64.0228	1.38424	Magmatic
91	CB16-1_23	111	61	42	414042	471.353	46.0474	8.00588	96.5964	1.611	Exhumational
92	CB16-1_24	87	35	40	414042	283.971	62.8199	13.31	81.2125	1.79599	Exhumational
93	CB16-1_26	14	65	40	414042	527.375	5.46757	1.65514	84.8351	1.37365	Exhumational
94	CB16-1_27	107	37	49	414042	245.06	73.027	14.8226	81.5103	1.93168	Magmatic
95	CB16-1_28	125	80	30	414042	865.435	39.5595	6.29549	61.4878	1.14041	Exhumational
96	CB16-1_29	93	42	50	414042	272.612	55.9899	11.112	77.5499	1.53719	Exhumational
97	CB16-1_30	52	20	30	414042	216.359	65.6935	17.8774	78.9769	1.49882	Magmatic
98	CB16-1_31	51	28	24	414042	378.628	46.0917	11.304	78.719	1.34209	Exhumational
99	CB16-1_32	75	21	36	414042	189.314	90.0676	23.0998	79.7589	2.00807	Magmatic
100	CB16-1_33	123	55	50	414042	356.992	56.5458	9.97795	52.2812	1.06567	Magmatic
101	CB16-1_34	123	42	42	414042	324.538	73.948	14.179	78.0855	1.74182	Magmatic
102	CB16-1_35	69	38	42	414042	293.63	45.9495	9.81579	80.0412	1.76931	Exhumational
103	CB16-1_36	112	38	50	414042	246.649	74.4199	14.897	59.5671	1.05525	Magmatic
104	CB16-1_37	91	40	42	414042	309.084	57.5183	11.6202	86.6334	1.64637	Exhumational
105	CB16-1_38	68	49	32	414042	496.949	35.1473	7.02415	65.9192	1.31894	Exhumational

## Sheet: CB-19
Table S1. Detrital zircon single grain fission-track and U-Pb data
Sample ID	CB-19
Formation	Tyonek Fm.
Analyst	Sonia Sanchez
Zeta [a cm-2]	122.673
Zeta Error	8.25757
	Analysis Name	Ns	Ni	n	ρd	U (ppm)	FT age (Ma)	FT 1σ error (Ma)	U-Pb age (Ma)	U-Pb 1σ error (Ma)	Grain Type
1	CB19-2_1	86	11	35	423323	99.7616	199.87	65.4899	175.918	6.08255	Magmatic
2	CB19-2_2	43	8	18	423323	141.077	138.074	54.0221	170.169	5.13728	Magmatic
3	CB19-2_3	87	27	35	423323	244.869	83.1273	19.2017	164.706	2.19054	Exhumational
4	CB19-2_4	79	20	40	423323	158.712	101.755	26.4336	168.133	4.21868	Exhumational
5	CB19-2_5	185	29	25	423323	368.211	163.548	34.5832	179.128	2.65799	Magmatic
6	CB19-2_6	90	21	35	423323	190.454	110.33	27.8144	166.696	3.69444	Exhumational
7	CB19-2_7	68	21	20	423323	333.294	83.5341	21.6465	168.354	2.93563	Exhumational
8	CB19-2_8	95	19	36	423323	167.529	128.536	33.514	179.064	4.14097	Exhumational
9	CB19-2_9	43	10	18	423323	176.346	110.694	39.6158	179.188	5.17681	Exhumational
10	CB19-2_10	82	11	25	423323	139.666	190.71	62.6533	171.457	3.80387	Magmatic
11	CB19-2_11	112	17	30	423323	179.873	168.835	45.4844	179.762	3.91571	Magmatic
12	CB19-2_12	51	25	40	423323	198.389	52.7525	13.3906	165.903	5.02149	Exhumational
13	CB19-2_13	103	26	36	423323	229.25	102.05	23.4928	164.333	5.02471	Exhumational
14	CB19-2_14	91	27	40	423323	214.261	86.9236	19.9833	171.266	5.59339	Exhumational
15	CB19-2_16	105	17	40	423323	134.905	158.411	42.8509	163.346	4.42607	Magmatic
16	CB19-2_25	94	10	32	423323	99.1947	239.566	81.4045	158.348	4.20613	Magmatic
17	CB19-2_35	11	17	36	423323	149.894	16.7791	6.59653	166.922	3.78919	Exhumational
18	CB19-2_47	91	27	30	423323	285.681	86.9236	19.9833	168.898	4.4591	Exhumational
19	CB19-2_46	138	16	24	423323	211.615	220.148	60.1176	183.325	3.97082	Magmatic
20	CB19-2_45	79	16	32	423323	158.712	126.945	35.9018	169.903	4.15737	Exhumational
21	CB19-2_44	150	35	24	423323	462.909	110.33	22.0835	174.682	3.65183	Exhumational
22	CB19-2_48	117	21	30	423323	222.196	143.064	35.3317	179.902	5.07292	Exhumational
23	CB19-2_49	193	40	36	423323	352.692	124.08	23.2156	185.212	3.83319	Exhumational
24	CB19-2_50	98	20	30	423323	211.615	125.99	32.1286	168.475	5.84851	Exhumational
25	CB19-2_51	101	14	28	423323	158.712	184.65	54.1989	166.804	3.23873	Magmatic
26	CB19-2_52	167	34	40	423323	269.81	126.29	25.329	168.997	3.69076	Exhumational
27	CB19-2_53	95	15	35	423323	136.038	162.384	46.5049	162.666	5.691	Magmatic
28	CB19-2_54	211	34	42	423323	256.962	159.156	31.4214	168.138	4.15791	Magmatic
29	CB19-2_55	75	16	24	423323	211.615	120.577	34.2445	159.848	5.26664	Exhumational
30	CB19-2_56	129	26	35	423323	235.8	127.557	28.8174	177.02	4.82599	Exhumational
31	CB19-2_58	167	38	36	423323	335.058	113.112	21.7955	167.699	3.30212	Exhumational
32	CB19-2_62	70	11	16	423323	218.228	163.151	54.1161	191.545	6.84131	Magmatic
33	CB19-2_63	74	22	36	423323	193.981	86.7511	21.9111	167.234	4.40607	Exhumational
34	CB19-2_65	62	13	35	423323	117.9	122.66	38.3745	164.863	4.92996	Exhumational
35	CB19-2_66	38	15	35	423323	136.038	65.4451	20.4675	164.571	4.32532	Exhumational
36	CB19-2_67	108	25	36	423323	220.433	111.205	25.862	167.587	3.29037	Exhumational
37	CB19-2_68	108	18	32	423323	178.551	153.938	40.6235	174.031	3.44045	Magmatic
38	CB19-2_69	132	27	21	423323	408.115	125.707	27.9507	174.303	3.25967	Exhumational
39	CB19-2_70	71	22	24	423323	290.971	83.2567	21.1224	161.703	3.43624	Exhumational
40	CB19-2_71	64	13	36	423323	114.625	126.578	39.4983	166.811	4.56637	Exhumational
41	CB19-2_72	75	11	24	423323	145.486	174.648	57.6783	171.922	5.39882	Magmatic
42	CB19-2_77	108	11	36	423323	96.9904	250.02	81.0133	260.232	9.06778	Magmatic
43	CB19-2_78	86	8	30	423323	84.6462	273.252	102.771	166.865	4.02349	Exhumational
44	CB19-2_79	25	19	90	423323	67.0116	34.0745	10.6374	195.584	3.59421	Exhumational
45	CB19-2_80	80	14	30	423323	148.131	146.691	43.7016	173.844	3.74739	Magmatic
46	CB19-2_82	36	6	31	423323	61.4367	153.938	68.7176	167.946	4.77807	Magmatic
47	CB19-2_84	63	9	35	423323	81.6231	179.241	65.0746	164.943	4.6847	Magmatic
48	CB19-2_86	94	11	32	423323	109.114	218.151	71.1498	163.446	4.11534	Magmatic
49	CB19-2_87	67	11	21	423323	166.269	156.243	51.9751	166.099	4.46085	Magmatic
50	CB19-2_88	84	11	21	423323	166.269	195.292	64.0721	180.865	4.51987	Magmatic
51	CB19-2_89	51	17	35	423323	154.177	77.4287	22.3415	168.569	3.52498	Exhumational
52	CB19-2_90	28	7	35	423323	63.4846	103.033	44.1237	15.8033	0.543707	Magmatic
53	CB19-2_91	101	17	35	423323	154.177	152.447	41.3438	168.504	3.63326	Magmatic
54	CB19-2_92	115	20	30	423323	211.615	147.597	37.1995	173.798	4.592	Magmatic
55	CB19-2_93	115	11	24	423323	145.486	265.895	85.9257	175.258	2.9388	Magmatic
56	CB19-2_94	69	12	30	423323	126.969	147.597	47.2891	162.89	3.15763	Magmatic
57	CB19-2_96	162	16	30	423323	169.292	257.679	69.8582	164.116	2.6423	Magmatic
58	CB19-2_97	163	18	30	423323	190.454	230.943	59.5618	173.625	3.2425	Magmatic
59	CB19-2_98	122	20	36	423323	176.346	156.473	39.2814	162.272	4.22162	Magmatic
60	CB19-2_102	93	13	30	423323	137.55	183.125	55.6958	165.886	3.29516	Magmatic
61	CB19-2_103	151	21	32	423323	208.309	184.05	44.7309	175.334	5.4777	Magmatic
62	CB19-2_106	159	22	36	423323	193.981	184.978	43.9958	171.807	4.49773	Magmatic
63	CB19-2_107	92	12	30	423323	126.969	196.055	61.6961	164.678	5.19311	Magmatic
64	CB19-2_108	142	19	30	423323	201.035	191.192	48.5566	171.15	3.62603	Magmatic
65	CB19-2_109	200	32	30	423323	338.585	160.274	32.4828	176.528	3.72724	Magmatic
66	CB19-2_110	165	38	25	423323	482.483	111.769	21.5578	180.291	3.619	Exhumational
67	CB19-2_111	56	14	21	423323	211.615	103.033	31.608	168.895	4.286	Exhumational
68	CB19-2_113	102	21	21	423323	317.423	124.899	31.1618	235.149	5.0687	Exhumational
69	CB19-2_114	76	16	40	423323	126.969	122.17	34.659	168.435	4.85533	Exhumational
70	CB19-2_115	66	17	42	423323	128.481	100.026	28.0787	169.61	5.29796	Exhumational
71	CB19-2_116	43	9	30	423323	95.2269	122.877	45.8437	167.924	5.32057	Magmatic
72	CB19-2_117	25	20	24	423323	264.519	32.375	9.96948	170.825	5.03293	Exhumational
73	CB19-2_118	98	14	18	423323	246.885	179.241	52.7037	200.121	4.37836	Magmatic
74	CB19-2_119	134	28	35	423323	253.939	123.08	26.9661	187.523	4.4857	Exhumational
75	CB19-2_120	98	16	24	423323	211.615	157.107	43.745	158.558	4.82066	Magmatic
76	CB19-2_121	94	16	24	423323	211.615	150.769	42.0976	173.725	5.55417	Magmatic
77	CB19-2_122	85	9	30	423323	95.2269	240.678	86.007	173.198	4.63122	Magmatic
78	CB19-2_124	57	20	30	423323	211.615	73.5792	19.794	166.595	4.34586	Exhumational
79	CB19-2_125	134	17	30	423323	179.873	201.485	53.7296	183.218	5.31432	Magmatic
80	CB19-2_126	119	11	20	423323	174.583	274.949	88.7272	200.249	4.81995	Magmatic
81	CB19-2_127	116	10	35	423323	90.6923	294.372	99.1498	179.25	6.01168	Magmatic
82	CB19-2_128	93	15	21	423323	226.731	159.007	45.6006	175.656	3.30538	Magmatic
83	CB19-2_129	120	24	25	423323	304.726	128.536	30.0965	202.42	5.19485	Exhumational
84	CB19-2_130	81	29	30	423323	306.842	72.1185	16.3907	176.246	5.00205	Exhumational
85	CB19-2_131	66	11	30	423323	116.388	153.938	51.2608	167.316	4.17277	Magmatic
86	CB19-2_132	63	14	40	423323	111.098	115.797	35.1472	178.39	7.30763	Exhumational
87	CB19-2_133	92	24	30	423323	253.939	98.7726	23.6564	170.214	4.84751	Exhumational
88	CB19-2_134	56	18	24	423323	238.067	80.2786	22.4548	165.251	3.13576	Exhumational
89	CB19-2_135	40	10	30	423323	105.808	103.033	37.1241	163.23	7.28859	Exhumational
90	CB19-2_136	74	32	20	423323	507.877	59.7665	13.3092	164.517	4.19731	Exhumational
91	CB19-2_138	57	8	24	423323	105.808	182.397	70.0199	165.661	4.35025	Magmatic
92	CB19-2_140	96	21	36	423323	185.163	117.618	29.4895	161.404	4.93772	Exhumational
93	CB19-2_141	97	25	35	423323	226.731	99.9658	23.4728	165.382	4.81446	Exhumational
94	CB19-2_142	58	23	21	423323	347.654	65.1471	16.6788	179.996	3.84101	Exhumational
95	CB19-2_143	92	14	36	423323	123.442	168.409	49.7089	165.267	3.62988	Magmatic
96	CB19-2_144	77	15	28	423323	170.048	131.929	38.3455	172.741	4.46345	Exhumational
97	CB19-2_145	117	25	20	423323	396.779	120.386	27.8122	183.268	4.36467	Exhumational
98	CB19-2_146	115	25	36	423323	220.433	118.347	27.3791	172.227	3.27432	Exhumational
99	CB19-2_147	116	34	25	423323	431.695	87.9839	18.2146	160.55	3.29784	Exhumational
100	CB19-2_148	59	8	30	423323	84.6462	188.704	72.2949	159.965	5.84119	Magmatic
101	CB19-2_151	59	14	28	423323	158.712	108.506	33.1261	166.83	4.38563	Exhumational
102	CB19-2_152	80	19	35	423323	172.315	108.41	28.6739	162.67	4.16123	Exhumational
103	CB19-2_153	47	20	25	423323	253.939	60.7312	16.7537	166.888	4.94221	Exhumational
104	CB19-2_154	39	8	20	423323	126.969	125.354	49.426	165.05	3.36462	Magmatic
105	CB19-2_156	99	15	36	423323	132.26	169.132	48.3118	167.505	3.81335	Magmatic

## Sheet: CB-17
Table S1. Detrital zircon single grain fission-track and U-Pb data
Sample ID	CB-17
Formation	Beluga Fm.
Analyst	Sonia Sanchez
Zeta [a cm-2]	122.673
Zeta Error	8.25757
	Analysis Name	Ns	Ni	n	ρd	U (ppm)	FT age (Ma)	FT 1σ error (Ma)	U-Pb age (Ma)	U-Pb 1σ error (Ma)	Grain Type
1	CB17-3_1	148	32	18	418682	570.562	117.692	24.3574	185.113	3.4539	Exhumational
2	CB17-3_2	159	33	28	418682	378.252	122.561	24.9429	346.663	6.55035	Exhumational
3	CB17-3_4	69	32	25	418682	410.805	55.1372	12.3989	78.3147	1.71533	Exhumational
4	CB17-3_5	180	121	40	418682	970.847	38.0897	5.2011	73.4855	0.995141	Exhumational
5	CB17-3_6	178	19	30	418682	203.263	236.206	59.3225	173.392	4.00124	Magmatic
6	CB17-3_7	149	19	35	418682	174.225	198.308	50.2344	89.1077	1.70251	Exhumational
7	CB17-3_8	171	93	36	418682	829.098	47.047	6.88658	52.8476	0.708108	Magmatic
8	CB17-3_9	75	20	35	418682	183.395	95.5898	24.9559	163.154	2.8508	Exhumational
9	CB17-3_10	94	29	30	418682	310.243	82.7075	18.4841	92.5513	2.21962	Magmatic
10	CB17-3_11	53	15	30	418682	160.471	90.1053	27.0856	156.694	4.48716	Exhumational
11	CB17-3_13	36	13	35	418682	119.207	70.7259	23.4066	200.666	4.6431	Exhumational
12	CB17-3_14	139	39	30	418682	417.224	90.8844	17.6374	102.456	2.51447	Magmatic
13	CB17-3_16	190	69	40	418682	553.624	70.3295	11.0266	88.9881	3.39902	Exhumational
14	CB17-3_17	59	22	20	418682	353.035	68.5053	17.7625	193.93	3.97278	Exhumational
15	CB17-3_18	130	38	30	418682	406.526	87.2612	17.1959	54.493	1.55529	Magmatic
16	CB17-3_19	65	21	42	418682	160.471	79.0013	20.5751	94.4418	2.00967	Magmatic
17	CB17-3_20	83	9	18	418682	160.471	232.585	83.2074	192.082	3.11735	Magmatic
18	CB17-3_21	180	65	18	418682	1158.95	70.7259	11.3527	73.0018	0.949446	Magmatic
19	CB17-3_22	196	62	25	418682	795.934	80.6767	13.0229	121.258	2.73376	Exhumational
20	CB17-3_23	107	89	36	418682	793.438	30.8006	4.90952	23.7461	0.354783	Magmatic
21	CB17-3_24	66	11	25	418682	141.214	152.271	50.7055	213.47	4.42465	Exhumational
22	CB17-3_25	124	29	30	418682	310.243	108.882	23.6984	121.203	2.32088	Magmatic
23	CB17-3_26	101	45	35	418682	412.639	57.3824	11.0301	88.9138	1.95518	Exhumational
24	CB17-3_27	74	40	40	418682	320.941	47.3348	9.85417	65.7386	1.56493	Exhumational
25	CB17-3_28	91	17	40	418682	136.4	136.021	37.161	167.73	3.33596	Magmatic
26	CB17-3_29	63	16	16	418682	320.941	100.332	28.94
27	CB17-3_30	125	35	16	418682	702.059	91.0699	18.5293	113.501	1.60497	Exhumational
28	CB17-3_31	101	34	40	418682	272.8	75.8385	15.933	115.172	2.10681	Exhumational
29	CB17-3_32	137	53	27	418682	629.996	66.0423	11.6266	111.418	1.88113	Exhumational
30	CB17-3_36	103	23	21	418682	351.507	113.99	27.4555	343.057	7.44555	Exhumational
31	CB17-3_37	183	58	30	418682	620.486	80.5216	13.3606	162.037	3.51439	Exhumational
32	CB17-3_38	101	16	35	418682	146.716	160.104	44.4923	122.658	2.35503	Magmatic
33	CB17-3_39	115	54	54	418682	320.941	54.4593	9.74802	77.76	1.04976	Exhumational
34	CB17-3_40	92	54	42	418682	412.639	43.6042	8.06544	58.2235	1.13297	Exhumational
35	CB17-3_41	87	16	40	418682	128.377	138.147	38.7846	155.847	2.63414	Magmatic
36	CB17-3_42	85	54	25	418682	693.233	40.2968	7.55055	196.425	3.53453	Exhumational
37	CB17-3_43	220	78	40	418682	625.836	72.0284	10.7299	114.463	2.21691	Exhumational
38	CB17-3_45	119	41	40	418682	328.965	74.1086	14.3738	55.908	1.10648	Magmatic
39	CB17-3_46	85	29	25	418682	372.292	74.8345	16.9121	187.827	3.94376	Exhumational
40	CB17-3_47	169	99	21	418682	1513.01	43.6901	6.30769	107.343	3.7768	Exhumational
41	CB17-3_48	31	9	16	418682	180.529	87.8538	33.8203	259.111	4.86818	Exhumational
42	CB17-3_49	56	16	24	418682	213.961	89.2611	26.0518	80.9704	1.4237	Magmatic
43	CB17-3_50	80	21	30	418682	224.659	97.0958	24.7441	91.5953	2.46211	Magmatic
44	CB17-3_52	223	54	28	418682	618.958	105.188	17.5473	123.59	2.58257	Exhumational
45	CB17-3_53	87	44	28	418682	504.336	50.5785	9.99447	73.0146	1.46373	Exhumational
46	CB17-3_54	119	16	30	418682	171.169	188.224	51.7973	109.569	2.73658	Magmatic
47	CB17-3_56	66	24	40	418682	192.565	70.2375	17.4387	209.161	4.49511	Exhumational
48	CB17-3_57	137	56	35	418682	513.506	62.5214	10.8258	74.573	1.18198	Exhumational
49	CB17-3_58	132	66	25	418682	847.285	51.1575	8.49166	77.3635	1.13741	Exhumational
50	CB17-3_59	115	37	36	418682	329.856	79.3278	15.9739	91.8959	2.10485	Magmatic
51	CB17-3_60	82	47	36	418682	419.007	44.6494	8.73774	73.9345	1.28145	Exhumational
52	CB17-3_61	80	31	42	418682	236.885	65.934	14.6818	73.7828	1.61882	Magmatic
53	CB17-3_62	230	82	30	418682	877.24	71.6313	10.471	81.7864	1.26992	Magmatic
54	CB17-3_63	112	61	36	418682	543.817	46.9795	8.15708	74.4113	1.91571	Exhumational
55	CB17-3_64	98	21	36	418682	187.216	118.742	29.7208	153.113	3.90828	Exhumational
56	CB17-3_65	54	26	25	418682	333.779	53.1171	13.2053	212.119	3.2791	Exhumational
57	CB17-3_66	64	43	35	418682	394.299	38.1093	7.96716	81.9315	1.38873	Exhumational
58	CB17-3_67	215	71	41	418682	555.776	77.2997	11.8652	77.5954	1.80366	Magmatic
59	CB17-3_68	47	6	16	418682	120.353	198.09	86.9721	114.862	2.44923	Magmatic
60	CB17-3_70	278	98	42	418682	748.863	72.4403	9.88664	76.7124	0.937761	Magmatic
61	CB17-3_71	29	20	27	418682	237.734	37.1296	11.096	26.329	0.736141	Magmatic
62	CB17-3_73	39	22	24	418682	294.196	45.3646	12.4997	100.054	1.84051	Exhumational
63	CB17-3_74	196	79	42	418682	603.675	63.4009	9.52826	72.0718	1.56369	Magmatic
64	CB17-3_75	121	42	20	418682	673.977	73.5631	14.1309	112.532	2.11989	Exhumational
65	CB17-3_77	74	45	20	418682	722.118	42.0925	8.47735	115.513	1.41813	Exhumational
66	CB17-3_78	87	34	28	418682	389.714	65.3793	13.9813	80.8844	1.45684	Exhumational
67	CB17-3_80	190	77	42	418682	588.392	63.0581	9.57896	165.986	3.29774	Exhumational
68	CB17-3_81	104	30	42	418682	229.244	88.4168	19.3255	162.609	3.65254	Exhumational
69	CB17-3_82	148	66	42	418682	504.336	57.331	9.37388	156.883	2.7565	Exhumational
70	CB17-3_83	170	33	35	418682	302.602	130.955	26.5198	343.11	7.67352	Exhumational
71	CB17-3_84	76	31	42	418682	236.885	62.6533	14.0435	70.2965	1.17791	Magmatic
72	CB17-3_85	92	20	36	418682	178.301	117.061	30.004	80.9546	1.15744	Magmatic
73	CB17-3_86	138	68	40	418682	545.6	51.9068	8.49399	63.7578	1.15807	Exhumational
74	CB17-3_88	104	42	16	418682	842.471	63.2783	12.3758	98.0162	1.99861	Exhumational
75	CB17-3_89	165	56	30	418682	599.09	75.2253	12.7536	1758.64	11.738	Exhumational
76	CB17-3_90	129	41	25	418682	526.344	80.2976	15.4388	81.9313	1.38779	Magmatic
77	CB17-1_3	121	51	40	416826	411.022	60.3746	10.9173	56.1389	1.53087	Magmatic
78	CB17-1_4	109	47	42	416826	360.748	59.0219	11.0855	59.5087	1.74611	Magmatic
79	CB17-1_6	62	15	36	416826	134.321	104.819	31.0273	209.224	4.65099	Exhumational
80	CB17-1_11	101	76	35	416826	700.004	33.8875	5.65875	52.5657	1.2051	Exhumational
81	CB17-1_12	78	27	35	416826	248.686	73.4394	17.1734	86.65	1.99447	Magmatic
82	CB17-1_13	134	30	21	416826	460.529	113.198	24.1782	190.835	3.00427	Exhumational
83	CB17-1_15	102	16	28	416826	184.212	160.961	44.7025	216.86	4.71902	Exhumational
84	CB17-1_16	61	30	20	416826	483.556	51.7771	12.0933	67.7943	1.62789	Exhumational
85	CB17-1_18	34	18	32	416826	181.333	48.1126	14.4172	87.1869	1.86894	Exhumational
86	CB17-1_19	110	39	28	416826	449.016	71.7108	14.2626	107.818	2.31759	Exhumational
87	CB17-1_20	119	22	36	416826	197.004	136.83	33.1466	167.503	3.59562	Magmatic
88	CB17-1_21	118	48	35	416826	442.108	62.547	11.5557	54.6555	1.5797	Magmatic
89	CB17-1_22	91	25	16	416826	503.704	92.3974	21.829	123.882	3.73661	Exhumational
90	CB17-1_23	65	29	30	416826	311.625	57.0514	13.3423	73.9892	1.85104	Exhumational
91	CB17-1_24	47	15	24	416826	201.482	79.6153	24.2492	118.441	2.27782	Exhumational
92	CB17-1_25	52	36	25	416826	464.213	36.8243	8.38382	159.88	6.31857	Exhumational
93	CB17-1_26	123	59	25	416826	760.794	53.0809	9.17928	75.2969	1.932	Exhumational
94	CB17-1_27	140	41	29	416826	455.765	86.7151	16.5348	187.796	4.18799	Exhumational
95	CB17-1_28	112	58	40	416826	467.437	49.1821	8.65876	73.6132	1.47187	Exhumational
96	CB17-1_29	97	28	35	416826	257.896	87.9674	19.8364	167.79	3.23303	Exhumational
97	CB17-1_30	105	37	25	416826	477.108	72.1489	14.6759	52.5822	1.27689	Magmatic
98	CB17-1_31	114	38	25	416826	490.003	76.2474	15.2329	109.788	2.77924	Exhumational
99	CB17-1_32	113	54	35	416826	497.372	53.2799	9.55978	111.759	2.64371	Exhumational
100	CB17-1_33	76	28	36	416826	250.733	69.0244	15.9949	204.858	5.4335	Exhumational
101	CB17-1_34	106	52	30	416826	558.776	51.9072	9.49919	89.3826	2.16113	Exhumational
102	CB17-1_35	85	16	30	416826	171.931	134.412	37.8007	219.82	5.0596	Exhumational
103	CB17-1_37	86	40	21	416826	614.039	54.7353	11.1442	72.6925	1.61143	Exhumational
104	CB17-1_39	129	38	20	416826	612.504	86.2131	17.0024	61.1976	1.20917	Magmatic
105	CB17-1_40	85	53	40	416826	427.141	40.8733	7.69658	39.4291	1.16105	Magmatic

## Sheet: CB-22
Table S1. Detrital zircon single grain fission-track and U-Pb data
Sample ID	CB-22
Formation	Beluga Fm.
Analyst	Sonia Sanchez
Zeta [a cm-2]	122.673
Zeta Error	8.25757
	Analysis Name	Ns	Ni	n	ρd	U (ppm)	FT age (Ma)	FT 1σ error (Ma)	U-Pb age (Ma)	U-Pb 1σ error (Ma)	Grain Type
1	CB22-3_3	74	24	18	431676	415.041	81.1264	19.8728	113.087	5.06835	Exhumational
2	CB22-3_4	34	12	21	431676	177.875	74.5864	25.5746	168.788	4.32528	Exhumational
3	CB22-3_5	121	55	25	431676	684.818	57.9889	10.2547	73.5379	1.45186	Exhumational
4	CB22-3_8	63	13	20	431676	202.333	127.054	39.6973	2633.71	11.3326	Exhumational
5	CB22-3_9	9	16	25	431676	199.22	14.8764	6.28406	161.05	4.0505	Exhumational
6	CB22-3_10	71	33	36	431676	285.341	56.7165	12.582	193.854	5.44883	Exhumational
7	CB22-3_11	203	51	32	431676	496.104	104.539	17.9123	116.753	3.04274	Magmatic
8	CB22-3_13	104	61	42	431676	452.099	44.9846	7.89917	69.6288	2.27383	Exhumational
9	CB22-3_14	50	21	28	431676	233.461	62.7354	16.8856	206.829	12.5536	Exhumational
10	CB22-3_15	102	13	28	431676	144.523	204.47	61.8677	158.388	4.14194	Magmatic
11	CB22-3_16	45	24	16	431676	466.922	49.4551	12.9639	167.196	2.75087	Exhumational
12	CB22-3_17	55	28	24	431676	363.161	51.8007	12.5526	71.922	3.26694	Exhumational
13	CB22-3_18	150	26	20	431676	404.665	150.973	33.743	189.745	4.10216	Exhumational
14	CB22-3_19	57	15	25	431676	186.769	99.8374	29.7904	176.548	3.84316	Exhumational
15	CB22-3_20	91	40	40	431676	311.281	59.9566	12.1128	69.2989	1.76946	Magmatic
16	CB22-3_21	60	43	40	431676	334.627	36.8399	7.79301	69.466	1.8796	Exhumational
17	CB22-3_22	43	14	25	431676	174.317	80.8151	25.4933	71.5746	1.80994	Magmatic
18	CB22-3_23	34	16	21	431676	237.167	56.0206	17.4239	175.618	4.32216	Exhumational
19	CB22-3_24	82	34	42	431676	251.989	63.5433	13.6924	99.419	2.51354	Exhumational
20	CB22-3_25	59	14	18	431676	242.108	110.629	33.7742	157.456	3.52722	Exhumational
21	CB22-3_26	203	95	36	431676	821.436	56.3314	8.02163	72.9438	1.75526	Exhumational
22	CB22-3_27	178	54	36	431676	466.922	86.6922	14.7535	161.023	3.97804	Exhumational
23	CB22-3_28	124	49	21	431676	726.323	66.6585	12.1637	106.292	2.49381	Exhumational
24	CB22-3_29	120	15	30	431676	155.641	208.415	58.8843	166.052	4.90096	Magmatic
25	CB22-3_30	85	32	35	431676	284.6	69.95	15.2997	369.734	7.72998	Exhumational
26	CB22-3_31	52	4	25	431676	49.805	335.334	175.548
27	CB22-3_32	89	52	35	431676	462.475	45.1587	8.48362	79.7903	2.11014	Exhumational
28	CB22-3_33	140	60	40	431676	466.922	61.4867	10.4047	148.904	3.59536	Exhumational
29	CB22-3_34	134	37	24	431676	479.892	95.1853	18.8734	99.4986	2.48874	Magmatic
30	CB22-3_35	105	48	35	431676	426.9	57.6609	10.8155	73.7269	1.53592	Exhumational
31	CB22-3_36	68	19	30	431676	197.145	94.0719	25.2707	91.9625	2.51628	Magmatic
32	CB22-3_37	64	27	36	431676	233.461	62.4579	14.9753	77.4269	2.30052	Magmatic
33	CB22-3_38	149	51	21	431676	755.968	76.8954	13.5704	107.307	2.10557	Exhumational
34	CB22-3_39	91	51	24	431676	661.472	47.0719	8.85932	78.0695	2.07826	Exhumational
35	CB22-3_40	80	28	40	431676	217.897	75.2096	17.321	73.7828	1.54141	Magmatic
36	CB22-3_41	188	48	40	431676	373.537	102.878	18.1072	163.346	3.50847	Exhumational
37	CB22-3_42	136	48	30	431676	498.05	74.5864	13.5517	89.7781	4.45676	Exhumational
38	CB22-3_43	151	83	30	431676	861.211	47.9908	7.35626	70.4825	1.7987	Exhumational
39	CB22-3_44	80	41	25	431676	510.501	51.4575	10.5099	69.4197	1.95309	Exhumational
40	CB22-3_45	176	34	30	431676	352.785	135.623	27.0972	86.6698	1.60134	Magmatic
41	CB22-3_46	20	10	40	431676	77.8203	52.7387	20.7515	160.43	4.14138	Exhumational
42	CB22-3_47	89	25	21	431676	370.573	93.5775	22.1566	81.0181	2.02251	Magmatic
43	CB22-3_48	97	56	36	431676	484.215	45.7004	8.30088	70.0748	1.31694	Exhumational
44	CB22-3_49	40	15	24	431676	194.551	70.2228	21.8134	75.1548	1.88809	Magmatic
45	CB22-3_50	229	18	36	431676	155.641	328.348	83.5501	228.978	11.0377	Magmatic
46	CB22-3_57	107	13	25	431676	161.866	214.328	64.6881	2066.21	14.2948	Exhumational
47	CB22-3_61	78	20	42	431676	148.229	102.444	26.6445	79.8211	2.5708	Magmatic
48	CB22-3_62	43	21	40	431676	163.423	53.9891	14.8544	82.0661	2.88758	Exhumational
49	CB22-3_63	36	14	16	431676	272.371	67.728	21.845	100.233	3.60477	Exhumational
50	CB22-3_64	144	37	28	431676	411.336	102.233	20.1367	86.8994	3.223	Magmatic
51	CB22-3_65	33	11	24	431676	142.67	78.9471	28.0276	82.4546	2.72789	Magmatic
52	CB22-3_66	114	9	25	431676	112.061	326.95	115.459	184.429	10.7763	Magmatic
53	CB22-3_68	109	36	36	431676	311.281	79.6736	16.2849	153.837	4.07216	Exhumational
54	CB22-3_69	52	24	35	431676	213.45	57.1142	14.6421	99.7052	8.69382	Exhumational
55	CB22-3_70	70	18	24	431676	233.461	102.154	27.9139	75.246	1.97073	Magmatic
56	CB22-3_71	123	45	24	431676	583.652	71.9686	13.4983	72.4586	2.48794	Magmatic
57	CB22-3_72	76	30	24	431676	389.101	66.7298	15.1164	69.418	2.6829	Magmatic
58	CB22-3_73	77	30	25	431676	373.537	67.6032	15.2888	186.083	6.87698	Exhumational
59	CB22-3_74	81	30	30	431676	311.281	71.0958	15.9775	161.425	4.45502	Exhumational
60	CB22-3_75	103	31	36	431676	268.048	87.3788	18.9014	90.069	2.45251	Magmatic
61	CB22-3_76	98	46	35	431676	409.112	56.1632	10.7694	67.8206	1.6033	Exhumational
62	CB22-3_77	31	16	36	431676	138.347	51.0971	16.1246	69.8494	2.02419	Exhumational
63	CB22-3_78	21	11	40	431676	85.6023	50.3508	19.0639	71.7981	2.52829	Exhumational
64	CB22-3_79	101	30	40	431676	233.461	88.5303	19.4081	83.0325	2.22296	Magmatic
65	CB22-3_80	117	29	30	431676	300.905	105.948	23.177	72.9451	1.90724	Magmatic
66	CB22-3_81	77	12	30	431676	124.512	167.697	53.3335	103.794	2.49711	Magmatic
67	CB22-3_82	110	42	24	431676	544.742	68.9755	13.3972	74.044	1.49215	Magmatic
68	CB22-3_83	94	57	40	431676	443.576	43.5174	7.90625	82.4158	2.06287	Exhumational
69	CB22-3_84	74	17	24	431676	220.491	114.237	31.7329	177.292	3.84166	Exhumational
70	CB22-3_89	77	23	36	431676	198.874	88.0382	21.7956	81.3261	1.91372	Magmatic
71	CB22-3_91	104	22	36	431676	190.227	123.967	30.3391	158.907	4.02563	Exhumational
72	CB22-3_95	63	13	18	431676	224.814	127.054	39.6973	96.6948	2.98481	Magmatic
73	CB22-3_96	150	49	40	431676	381.319	80.5483	14.3865	71.2752	2.12201	Magmatic
74	CB22-3_98	87	37	40	431676	287.935	61.9592	12.8998	76.4024	2.10883	Exhumational
75	CB22-3_99	144	44	30	431676	456.546	86.0764	15.9873	163.797	3.43385	Exhumational
76	CB22-3_100	36	17	35	431676	151.194	55.8276	16.8805	71.5956	2.205	Magmatic
77	CB22-3_101	35	16	32	431676	155.641	57.6609	17.856	102.477	2.75008	Exhumational
78	CB22-3_102	216	96	24	431676	1245.12	59.3008	8.35948	103.822	2.32353	Exhumational
79	CB22-3_104	113	83	40	431676	645.908	35.9473	5.76539	58.6835	1.7861	Exhumational
80	CB22-3_105	89	16	28	431676	177.875	145.624	40.8167	165.627	4.42993	Magmatic
81	CB22-3_106	112	15	28	431676	166.758	194.728	55.2221	158.478	2.9517	Magmatic
82	CB22-3_107	139	34	24	431676	440.982	107.348	21.8503	87.9598	2.14764	Magmatic
83	CB22-3_108	67	26	40	431676	202.333	67.8719	16.3756	68.3346	1.64032	Magmatic
84	CB22-3_109	120	24	30	431676	249.025	131.047	30.6844	171.941	5.55161	Exhumational
85	CB22-3_110	36	22	24	431676	285.341	43.1819	12.0645	88.9725	2.42277	Exhumational
86	CB22-3_111	91	28	16	431676	544.742	85.4826	19.4045	213.685	8.89834	Exhumational
87	CB22-3_112	19	19	36	431676	164.287	26.4233	8.76714	134.41	3.28686	Exhumational
88	CB22-3_113	118	35	36	431676	302.634	88.6546	18.141	371.335	9.38041	Exhumational
89	CB22-3_114	152	24	20	431676	373.537	165.547	38.1374	186.125	6.22317	Magmatic
90	CB22-3_115	50	15	36	431676	129.7	87.6597	26.515	156.233	4.12382	Exhumational
91	CB22-3_116	102	47	25	431676	585.208	57.2072	10.8401	75.9144	1.61513	Exhumational
92	CB22-3_117	142	31	21	431676	459.51	120.157	25.2404	181.008	3.74574	Exhumational
93	CB22-3_118	179	37	25	431676	460.696	126.838	24.5421	188.816	4.46319	Exhumational
94	CB22-3_119	114	31	30	431676	321.657	96.6409	20.6946	105.833	2.89412	Magmatic
95	CB22-3_120	56	17	30	431676	176.393	86.6353	24.7338	87.2787	2.41992	Magmatic
96	CB22-3_121	181	120	36	431676	1037.6	39.8137	5.44207	70.4634	1.2106	Exhumational
97	CB22-3_122	74	77	35	431676	684.818	25.3958	4.49485	70.0795	1.62909	Exhumational
98	CB22-3_124	59	22	36	431676	190.227	70.6196	18.3107	80.9919	2.24753	Magmatic
99	CB22-3_126	93	23	27	431676	265.165	106.182	25.8038	150.228	3.16273	Exhumational
100	CB22-3_127	15	20	32	431676	194.551	19.8276	6.91105	72.7985	2.34581	Exhumational
101	CB22-3_129	232	8	25	431676	99.6099	725.458	265.696	2569.3	18.1558	Exhumational
102	CB22-3_130	42	19	20	431676	295.717	58.2651	16.6098	73.9879	1.96104	Magmatic
103	CB22-3_131	86	24	18	431676	415.041	94.1863	22.7065	105.312	2.48378	Magmatic
104	CB22-3_132	116	49	28	431676	544.742	62.3787	11.4774	73.6074	1.76321	Magmatic
105	CB22-3_133	175	29	29	431676	311.281	157.83	33.4892	165.842	3.62567	Magmatic

## Sheet: CB-20
Table S1. Detrital zircon single grain fission-track and U-Pb data
Sample ID	CB-20
Formation	Sterling Fm.
Analyst	Sonia Sanchez
Zeta [a cm-2]	122.673
Zeta Error	8.25757
	Analysis Name	Ns	Ni	n	ρd	U (ppm)	FT age (Ma)	FT 1σ error (Ma)	U-Pb age (Ma)	U-Pb 1σ error (Ma)	Grain Type
1	CB20-2_1	48	23	28	426107	259.037	54.3151	14.2816	89.5762	1.56142	Exhumational
2	CB20-2_2	204	24	27	426107	280.31	218.414	49.515	181.243	3.51273	Magmatic
3	CB20-2_3	56	17	50	426107	107.219	85.5251	24.4168	156.524	3.15977	Exhumational
4	CB20-2_4	252	33	40	426107	260.163	196.557	38.865	172.287	2.81916	Magmatic
5	CB20-2_5	98	42	36	426107	367.907	60.6972	11.962	70.7199	1.66023	Magmatic
6	CB20-2_6	166	44	30	426107	462.512	97.8573	17.9314	175.146	3.04268	Exhumational
7	CB20-2_8	101	24	30	426107	252.279	109.061	25.899	211.131	6.05269	Exhumational
8	CB20-2_9	41	22	50	426107	138.754	48.5248	13.2598	75.6872	1.49013	Exhumational
9	CB20-2_10	126	30	24	426107	394.186	108.847	23.3692	173.382	3.6217	Exhumational
10	CB20-2_11	122	20	36	426107	175.194	157.49	39.5366	174.684	4.12444	Magmatic
11	CB20-2_13	122	43	40	426107	339	73.7299	14.0432	76.4233	1.93585	Magmatic
12	CB20-2_15	56	7	35	426107	63.0698	205.769	83.7202	170.065	2.7365	Magmatic
13	CB20-2_16	165	33	30	426107	346.884	129.373	26.2564	175.738	4.23324	Exhumational
14	CB20-2_17	41	20	40	426107	157.675	53.3573	15.0176	88.4534	1.8406	Exhumational
15	CB20-2_18	49	17	40	426107	134.023	74.8963	21.7144	72.182	1.41	Magmatic
16	CB20-2_19	98	15	35	426107	135.15	168.533	48.171	166.109	3.52594	Magmatic
17	CB20-2_20	85	44	30	426107	462.512	50.2932	9.97246	87.7879	1.96139	Exhumational
18	CB20-2_21	37	18	40	426107	141.907	53.5013	15.8176	149.991	3.18718	Exhumational
19	CB20-2_22	79	19	40	426107	149.791	107.765	28.5354	77.7126	1.40808	Magmatic
20	CB20-2_23	107	18	40	426107	141.907	153.521	40.5386	161.342	2.94254	Magmatic
21	CB20-2_25	109	24	40	426107	189.209	117.621	27.7513	162.246	2.66528	Exhumational
22	CB20-2_26	152	20	35	426107	180.199	195.635	48.4781	165.16	2.92558	Magmatic
23	CB20-2_27	178	24	35	426107	216.239	190.985	43.5973	181.029	3.16609	Magmatic
24	CB20-2_28	93	21	30	426107	220.744	114.718	28.8391	39.9221	0.760788	Exhumational
25	CB20-2_30	127	38	35	426107	342.379	86.7626	17.1376	164.62	2.55037	Exhumational
26	CB20-2_31	142	22	30	426107	231.256	166.526	39.8699	177.44	3.88955	Magmatic
27	CB20-2_32	59	18	40	426107	141.907	85.1036	23.6659	157.215	3.45163	Exhumational
28	CB20-2_33	60	32	40	426107	252.279	48.8196	11.2117	85.0565	2.19935	Exhumational
29	CB20-2_34	109	22	40	426107	173.442	128.208	31.2614	158.908	3.67891	Magmatic
30	CB20-2_35	137	30	36	426107	262.791	118.263	25.2147	172.504	3.08092	Exhumational
31	CB20-2_36	55	33	40	426107	260.163	43.4134	10.0237	90.7719	1.87929	Exhumational
32	CB20-2_37	71	34	36	426107	297.83	54.3483	11.947	85.6991	1.70993	Exhumational
33	CB20-2_38	150	35	36	426107	306.589	111.049	22.2275	162.037	2.54153	Exhumational
34	CB20-2_39	29	19	35	426107	171.189	39.7688	12.0585	93.5976	2.18011	Exhumational
35	CB20-2_40	65	19	40	426107	149.791	88.7981	23.9659	84.2637	1.61391	Magmatic
36	CB20-2_41	129	37	36	426107	324.109	90.4846	18.0072	169.083	2.86088	Exhumational
37	CB20-2_42	44	18	25	426107	227.051	63.5734	18.3273	170.398	3.02609	Exhumational
38	CB20-2_43	182	39	30	426107	409.954	120.828	22.9132	165.692	3.41958	Exhumational
39	CB20-2_44	204	43	40	426107	339	122.816	22.3051	90.6191	1.95063	Magmatic
40	CB20-2_45	176	26	36	426107	227.752	174.536	38.623	163.422	3.37554	Magmatic
41	CB20-2_46	115	31	35	426107	279.309	96.2341	20.5903	170.507	2.771	Exhumational
42	CB20-2_47	46	29	40	426107	228.628	41.3243	10.2103	34.0245	0.765807	Magmatic
43	CB20-2_48	70	13	35	426107	117.13	139.218	43.1428	159.317	3.95287	Magmatic
44	CB20-2_49	31	10	36	426107	87.597	80.5165	29.8111	155.199	2.96594	Exhumational
45	CB20-2_50	111	44	30	426107	462.512	65.599	12.5433	172.896	3.43664	Exhumational
46	CB20-2_51	45	14	40	426107	110.372	83.4657	26.1923	85.7759	1.89105	Magmatic
47	CB20-2_52	99	60	35	426107	540.598	42.9807	7.63959	33.7673	0.803293	Magmatic
48	CB20-2_53	70	16	40	426107	126.14	113.343	32.3793	159.968	3.73469	Exhumational
49	CB20-2_54	37	15	40	426107	118.256	64.1484	20.1348	152.778	3.39705	Exhumational
50	CB20-2_55	87	19	50	426107	119.833	118.578	31.1369	168.937	3.89767	Exhumational
51	CB20-2_57	68	16	50	426107	100.912	110.132	31.543	164.08	3.79456	Exhumational
52	CB20-2_58	38	16	50	426107	100.912	61.7759	18.904	71.4038	1.98297	Magmatic
53	CB20-2_59	178	30	35	426107	270.299	153.238	32.0618	176.42	2.77216	Magmatic
54	CB20-2_60	99	16	40	426107	126.14	159.721	44.4434	172.389	3.67141	Magmatic
55	CB20-2_61	131	50	36	426107	437.985	68.1151	12.2719	165.002	3.60823	Exhumational
56	CB20-2_62	80	30	40	426107	236.512	69.3218	15.6026	156.414	3.04589	Exhumational
57	CB20-2_63	10	11	25	426107	138.754	23.7163	10.4925	168.487	4.00199	Exhumational
58	CB20-2_64	60	23	35	426107	207.229	67.8227	17.2875	74.6048	1.58261	Magmatic
59	CB20-2_65	130	30	35	426107	270.299	112.272	24.0408	171.051	3.11422	Exhumational
60	CB20-2_67	90	26	40	426107	204.977	89.8417	20.9541	158.023	3.27566	Exhumational
61	CB20-2_68	90	20	36	426107	175.194	116.552	29.9283	170.908	3.21055	Exhumational
62	CB20-2_69	50	21	40	426107	165.558	61.93	16.6688	163.609	3.13995	Exhumational
63	CB20-2_70	99	29	36	426107	254.031	88.6109	19.6966	168.291	3.52843	Exhumational
64	CB20-2_71	148	43	30	426107	452	89.3344	16.6742	162.519	3.85687	Exhumational
65	CB20-2_72	96	36	40	426107	283.814	69.3218	14.3782	74.8857	1.47942	Magmatic
66	CB20-2_73	57	31	36	426107	271.551	47.8782	11.1903	84.9343	1.46928	Exhumational
67	CB20-2_74	58	18	24	426107	236.512	83.6705	23.3113	86.1196	1.62039	Magmatic
68	CB20-2_75	136	47	35	426107	423.469	75.1873	13.7523	176.139	3.48724	Exhumational
69	CB20-2_76	159	60	36	426107	525.582	68.8908	11.4826	85.712	2.06923	Exhumational
70	CB20-2_77	86	22	24	426107	289.07	101.367	25.2214	184.209	3.67702	Exhumational
71	CB20-2_78	130	90	50	426107	567.628	37.6418	5.78619	111.464	6.86351	Exhumational
72	CB20-2_79	104	36	35	426107	324.359	75.0651	15.4238	97.1496	2.45309	Exhumational
73	CB20-2_80	52	15	40	426107	118.256	89.9738	27.1003	170.268	3.85141	Exhumational
74	CB20-2_81	228	49	40	426107	386.303	120.479	20.7349	154.743	3.30239	Exhumational
75	CB20-2_82	70	19	35	426107	171.189	95.5783	25.6005	155.977	3.40831	Exhumational
76	CB20-2_83	36	13	36	426107	113.876	71.9732	23.8194	163.402	3.06243	Exhumational
77	CB20-2_86	103	15	40	426107	118.256	177.014	50.4416	169.59	4.06841	Magmatic
78	CB20-2_87	45	14	16	426107	275.93	83.4657	26.1923	188.316	6.16553	Exhumational
79	CB20-2_88	76	33	36	426107	289.07	59.9126	13.1653	84.1201	1.79829	Exhumational
80	CB20-2_89	70	31	50	426107	195.516	58.7481	13.3151	84.2121	2.01725	Exhumational
81	CB20-2_90	109	21	50	426107	132.447	134.25	33.3252
82	CB20-2_91	85	49	35	426107	441.489	45.1792	8.6902	181.368	3.80432	Exhumational
83	CB20-2_92	126	17	36	426107	148.915	190.86	51.0656	168.256	3.55131	Magmatic
84	CB20-2_93	46	10	36	426107	87.597	119.118	42.3774	170.785	3.81981	Exhumational
85	CB20-2_94	78	34	40	426107	268.047	59.6818	12.9467	75.759	2.21324	Exhumational
86	CB20-2_95	87	72	50	426107	454.103	31.5038	5.47557	34.5311	0.712204	Magmatic
87	CB20-2_96	149	24	30	426107	252.279	160.252	36.9637	175.94	3.43014	Magmatic
88	CB20-2_97	131	21	36	426107	183.954	161.011	39.4652	168.187	3.65227	Magmatic
89	CB20-2_98	140	91	50	426107	573.935	40.0843	6.07344	36.4268	0.8207	Magmatic
90	CB20-2_99	24	7	30	426107	73.5814	88.9919	38.7242	88.0042	2.44286	Magmatic
91	CB20-2_100	77	26	40	426107	204.977	76.9416	18.2522	174.654	3.26143	Exhumational
92	CB20-2_101	43	21	40	426107	165.558	53.2955	14.6636	97.6799	2.35023	Exhumational
93	CB20-2_102	132	19	24	426107	249.651	179.066	45.6646	183.157	4.09	Magmatic
94	CB20-2_103	108	110	35	426107	991.097	25.6098	3.89872	34.91	0.734629	Exhumational
95	CB20-2_104	79	15	36	426107	131.395	136.2	39.51	167.725	3.66743	Magmatic
96	CB20-2_105	106	16	40	426107	126.14	170.866	47.3394	175.837	3.24946	Magmatic
97	CB20-2_106	48	25	50	426107	157.675	49.9867	12.8086	38.7668	0.832033	Magmatic
98	CB20-2_107	128	34	36	426107	297.83	97.6508	20.0243	174.236	3.34068	Exhumational
99	CB20-2_108	76	26	40	426107	204.977	75.9482	18.0439	162.559	3.32089	Exhumational
100	CB20-2_109	89	18	40	426107	141.907	127.95	34.2411	167.649	3.47737	Exhumational
101	CB20-2_110	84	12	35	426107	108.12	180.404	57.0669	168.406	4.0803	Magmatic
102	CB20-2_111	29	14	30	426107	147.163	53.9127	17.9406	35.5375	0.912994	Magmatic
103	CB20-2_112	30	9	35	426107	81.0897	86.5364	33.4338	75.8464	2.17505	Magmatic
104	CB20-2_113	54	11	40	426107	86.721	127.044	42.9425	158.317	3.87327	Magmatic
105	CB20-2_114	119	34	50	426107	214.437	90.8329	18.7566	75.219	1.35299	Magmatic

[truncated: 7 more sheets: CB-53, CB-59, CB-41, CB-40, CB-44, CB-58, CB-57]
